# Supplementary material
Source: publisher site journal article supplement (https://www.dovepress.com/article/571454)
Supplement: Supplementary file 1 [file 571454_Supplementary%20materials_1.pdf]

# Supplementary Materials

## Supplementary Methods

### Data Preprocessing

To address missing data, we used multiple imputations with predictive mean matching (PMM) to fill in missing values. Specifically, we conducted 10 imputations ( $m = 10$ ) using the Multivariate Imputation by Chained Equations (MICE) algorithm. Both continuous and categorical variables were imputed. For continuous variables, PMM was applied, while predicted probability matching was used for categorical variables. After imputation, the model estimates were pooled across all imputed datasets to account for potential biases introduced by missing data.

To minimize the risk of reverse causality, individuals with pre-existing relevant conditions at baseline (e.g., diagnosed reproductive disorders, chronic diseases) were excluded from the analyses. This exclusion helped ensure that the observed associations between sleep traits and reproductive endocrine disorders (REDs) were not confounded by prior health conditions.

### Genetic Instrument Sensitivity:

In our Mendelian Randomization (MR) analyses, we conducted a series of rigorous quality control procedures to assess the robustness of our genetic instrument selection (IVs). We employed a dual-threshold strategy for IV selection. First, single nucleotide polymorphisms (SNPs) meeting the genome-wide significance threshold ( $P < 5 \times 10^{-8}$ ) were extracted as IVs. Given the limited number of exposures (long sleep duration, short sleep duration) surpassing this threshold, a second, more relaxed cutoff ( $P < 1 \times 10^{-5}$ ) was applied to identify additional potential causal variants. Following initial selection, we performed linkage disequilibrium (LD) clumping ( $R^2 < 0.001$ ,

window size = 10,000 kb) to ensure SNP independence. To exclude weak instruments, only SNPs with F statistics  $> 10$  (calculated as  $F = \beta^2/SE^2$ ) were retained. To mitigate potential reverse causality, SNPs significantly associated with REDs ( $P < 5 \times 10^{-5}$ ) were removed. Palindromic SNPs with ambiguous strand orientations (e.g., A/T or G/C) were excluded, and allele harmonization was performed against the human genome reference (build 37). Horizontal pleiotropy was assessed via the MR-PRESSO global test, and outlier SNPs identified via the distortion test were removed before downstream MR analyses. The final IV dataset included detailed annotations for each SNP, including chromosomal position, effect allele, other allele, effect size, standard error, P value, effect allele frequency, and F statistic for subsequent causal inference.

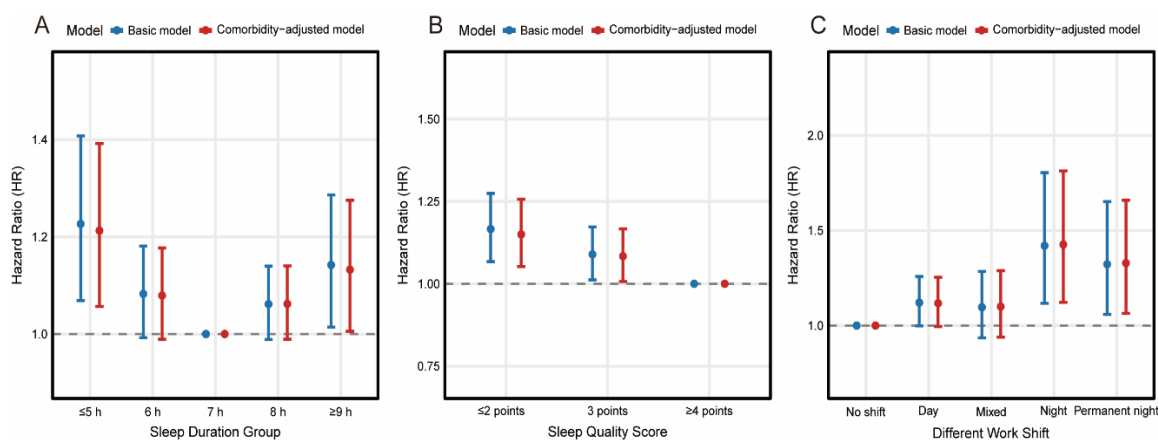

**Supplementary Figure S1. Sensitivity analyses using complete-case data for associations of sleep duration, sleep quality, and shift work type with REDs risk.** Hazard ratios (HRs) and 95% confidence intervals (CIs) were estimated using Cox proportional hazards models based on a complete-case dataset (excluding participants with missing covariate data), under two adjustment strategies: a basic model and a comorbidity-adjusted model. **A.** Association between sleep length and REDs risk. Both short ( $\leq 5$  h) and long ( $\geq 9$  h) sleep durations remained significantly associated

with increased REDs risk compared to 7 h, consistent with main analyses. **B.** Association between sleep quality and REDs risk. Lower sleep quality scores ( $\leq 2$  and 3 points) were again associated with elevated risk relative to higher scores ( $\geq 4$  points), showing a similar dose-response pattern. **C.** Association between types of shift work and REDs risk. Night shift work continued to show a significant association with higher REDs risks, while permanent night shift remained non-significant. Day and mixed shifts showed no association. Data are shown as  $\beta$ -estimates  $\pm$  95% CIs, with center circles and error bars. See Supplementary Table S15-16 and S18 for complete numerical results.

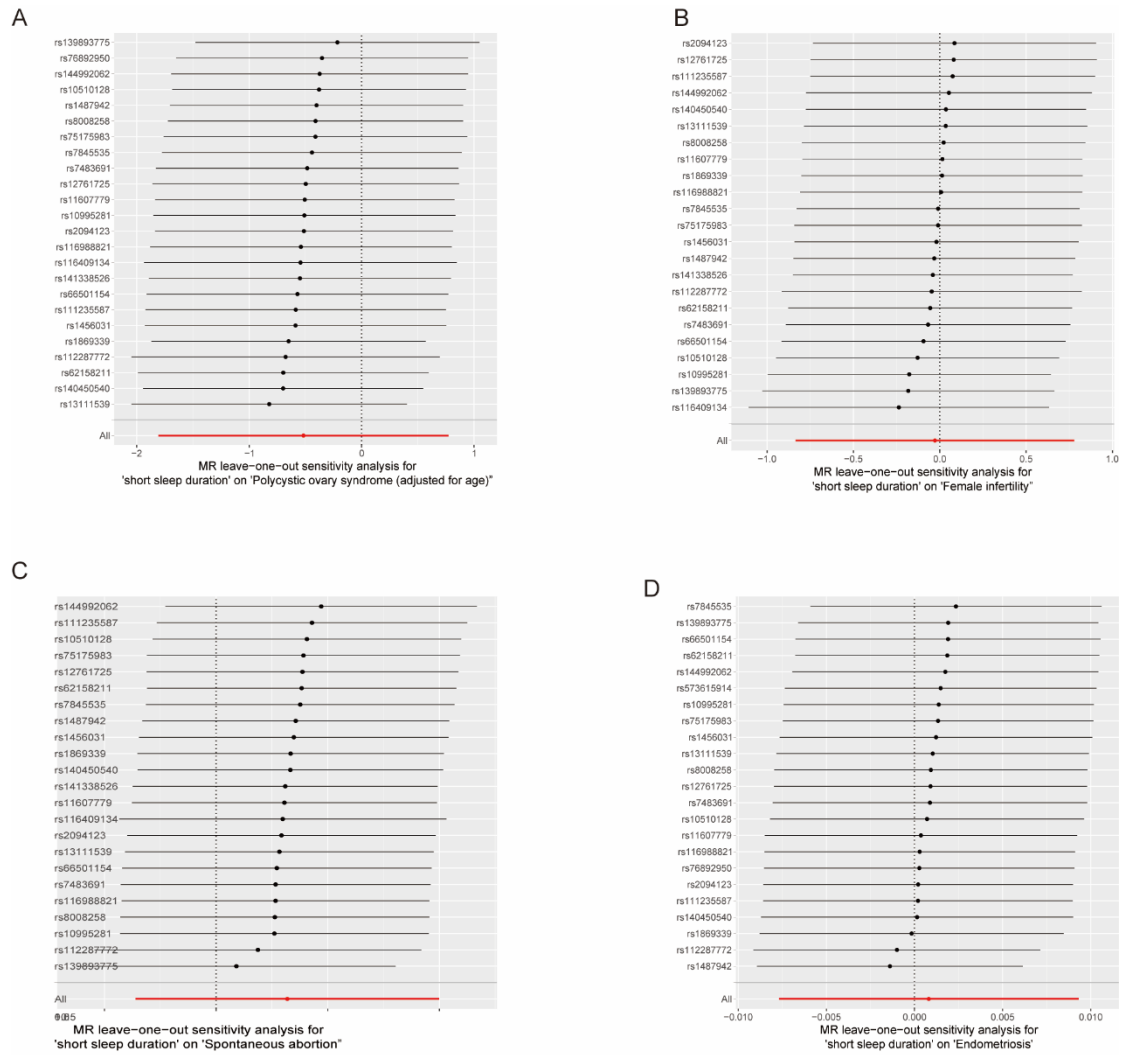

**Supplementary Figure S2. Leave-one-out sensitivity analyses for the causal effect of short sleep duration on reproductive endocrine disorders.** Each panel displays the results of a leave-one-out Mendelian randomisation (MR) sensitivity analysis, in which the causal estimate was recalculated by sequentially excluding each single nucleotide polymorphism (SNP) instrument. The x-axis represents the MR effect estimate and its 95% confidence interval (CI) for each leave-one-out iteration. The dashed vertical line indicates the MR estimate using all SNPs. Panels show the associations of genetically predicted short sleep duration with (A) polycystic ovary syndrome (PCOS), (B) female infertility, (C) spontaneous abortion, (D) Endometriosis. The consistency of

estimates across all iterations suggests that the observed associations are not driven by any single SNP, indicating robust causal inference.

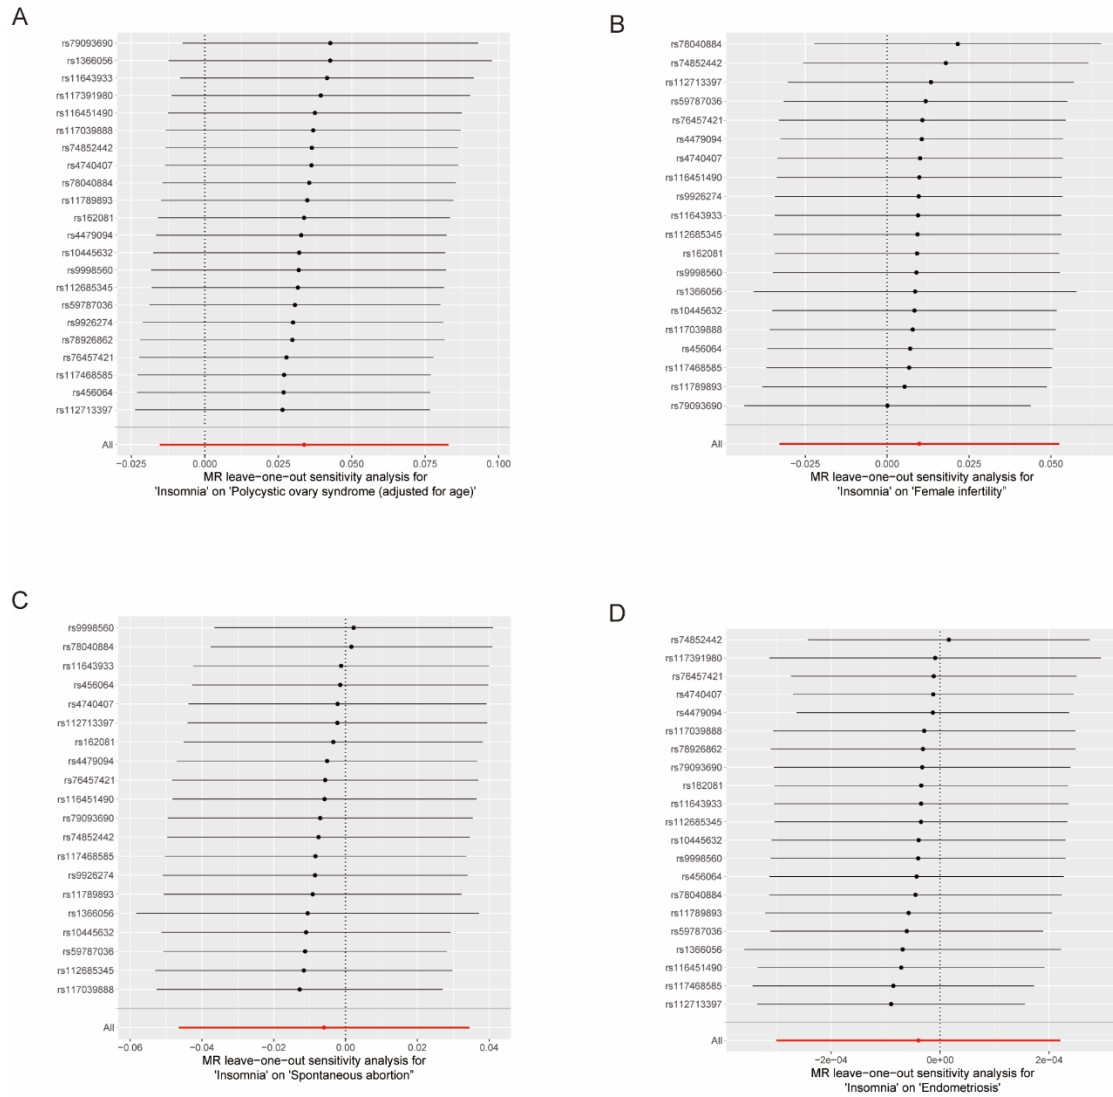

**Supplementary Figure S3. Leave-one-out sensitivity analyses for the effect of insomnia on reproductive endocrine disorders.** Mendelian randomisation estimates were recalculated by excluding one SNP at a time. Results support the robustness of causal estimates. **(A)** Polycystic ovary syndrome (PCOS); **(B)** Female infertility; **(C)** Spontaneous abortion; **(D)** Endometriosis.

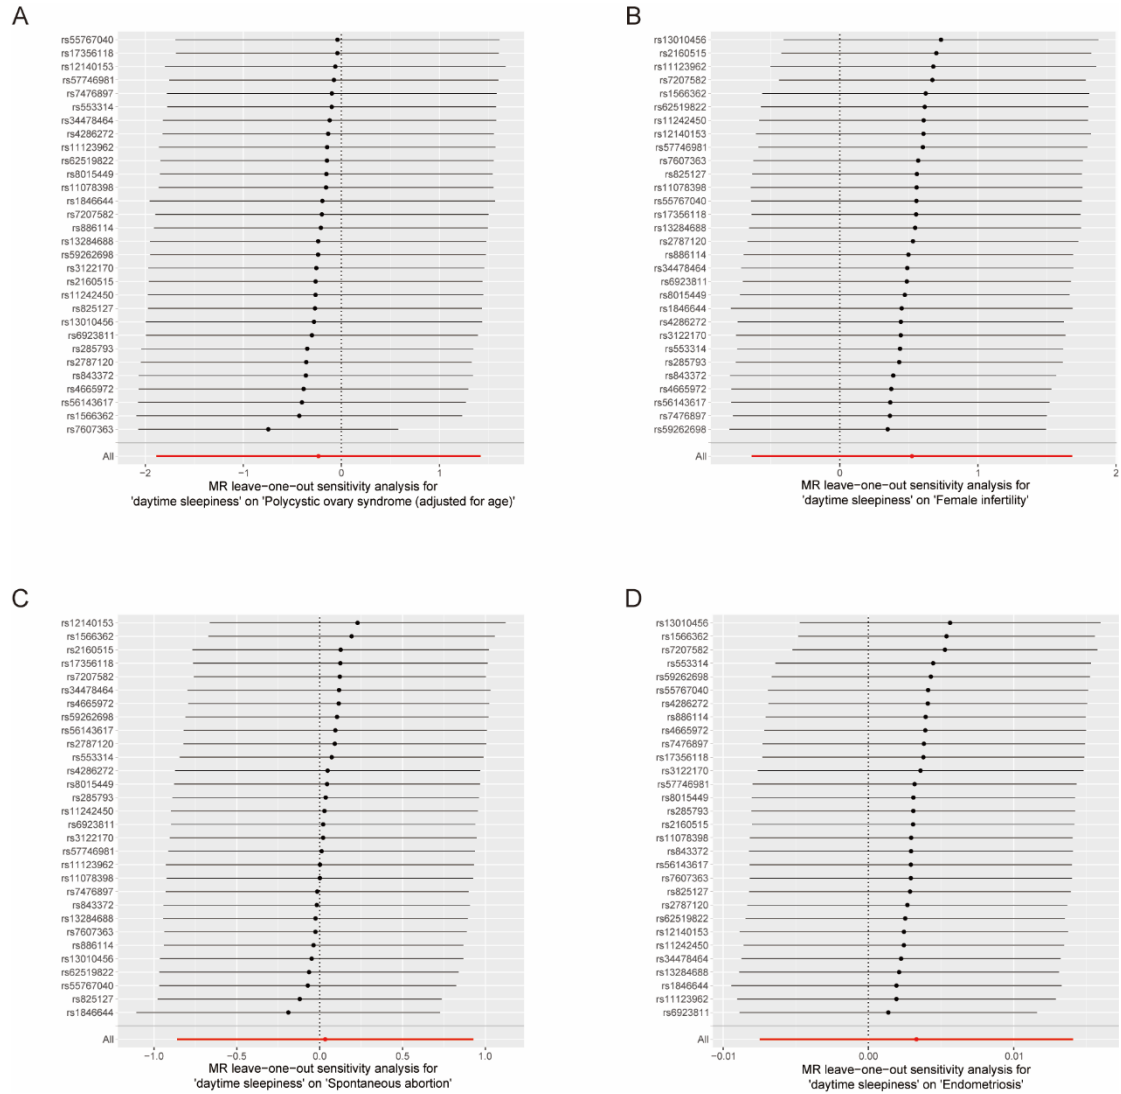

**Supplementary Figure S4. Leave-one-out sensitivity analyses for the effect of daytime sleepiness on reproductive endocrine disorders.** Mendelian randomization estimates were recalculated by excluding one SNP at a time. Results support the robustness of causal estimates. **(A)** Polycystic ovary syndrome (PCOS); **(B)** Female infertility; **(C)** Spontaneous abortion; **(D)** Endometriosis.

| <b>Supplementary Table S1. Table of International Classification of Diseases (ICD) Codes and Corresponding Data Fields</b> |                        |
|----------------------------------------------------------------------------------------------------------------------------|------------------------|
| <b>Data-Field</b>                                                                                                          | <b>Data-Field code</b> |
| Age                                                                                                                        | 21022                  |
| Sex                                                                                                                        | 31                     |
| Townsend                                                                                                                   | 22189                  |
| Ethnic                                                                                                                     | 21000_i0               |
| Date of death                                                                                                              | 40000_i0               |
| Date lost to follow-up                                                                                                     | 191                    |
| Baseline date                                                                                                              | 53_i0                  |
| Assessment centre                                                                                                          | 54_i0                  |
| Neutrophils                                                                                                                | 30140                  |
| Monocytes                                                                                                                  | 30130                  |
| Basophils                                                                                                                  | 30160                  |
| Eosinophils                                                                                                                | 30150                  |
| Total leukocytes                                                                                                           | 30000                  |
| Neutrophil to leukocyte ratio (NLR)                                                                                        | 30200                  |
| C-reactive protein (CRP) levels                                                                                            | 30710                  |
| Employment status                                                                                                          | 6142                   |
| Smoking status                                                                                                             | 20116                  |
| Alcohol drinker status intake                                                                                              | 20117                  |
| Alcohol frequency                                                                                                          | 1558                   |
| Physical activity                                                                                                          | 22040                  |
| Sleep duration (length)                                                                                                    | 1160                   |
| chronotype                                                                                                                 | 1180                   |
| Sleeplessness/Insomnia                                                                                                     | 1200                   |
| Hypertension diagnosis (Vascular/heart problems diagnosed by doctor — code 4 = High blood pressure)                        | 6150                   |
| Current medication for cholesterol, blood pressure, diabetes, or insulin (male) — code 2 = Blood pressure medication       | 6177                   |
| Current medication for cholesterol, blood pressure, diabetes, or insulin (female) — code 2 = Blood pressure medication     | 6153                   |

|                                                                                                                                                    |                                                                                                                                                 |
|----------------------------------------------------------------------------------------------------------------------------------------------------|-------------------------------------------------------------------------------------------------------------------------------------------------|
| Non-cancer illness code, self-reported — code 1065 = Hypertension; code 1072 = Essential hypertension                                              | 20002                                                                                                                                           |
| Diabetes diagnosed by doctor — code 1 = Yes                                                                                                        | 2443                                                                                                                                            |
| Current medication for cholesterol, blood pressure, diabetes, or insulin (male) — code 3 = Insulin/diabetes injection; code 4 = Diabetes tablets   | 6177                                                                                                                                            |
| Current medication for cholesterol, blood pressure, diabetes, or insulin (female) — code 3 = Insulin/diabetes injection; code 4 = Diabetes tablets | 6153                                                                                                                                            |
| Non-cancer illness code, self-reported — 1220 = Diabetes (unspecified); 1222 = Type 1 diabetes; 1223 = Type 2 diabetes                             | 20002                                                                                                                                           |
| Snoring                                                                                                                                            | 1210                                                                                                                                            |
| Daytime sleepiness/dozing                                                                                                                          | 1220                                                                                                                                            |
| Shift work status - "Does your work involve shift work?"                                                                                           | 826                                                                                                                                             |
| Shift work schedule - "Does your work involve night shifts?"                                                                                       | 3426                                                                                                                                            |
| Family history                                                                                                                                     | 1010                                                                                                                                            |
| Education                                                                                                                                          | 6138                                                                                                                                            |
| Medical condition                                                                                                                                  | ICD9/ICD10 code                                                                                                                                 |
| Diagnosis of hypertension                                                                                                                          | I10-I15, 401-405                                                                                                                                |
| History of sleep apnea                                                                                                                             | G47.3                                                                                                                                           |
| History of depression                                                                                                                              | F32, F320, F321, F322, F323, F328, F329, F33, F330, F331, F332, F333, F334, F338, F339, F34, F340, F341, F348, F349, F38, F380, F381, F388, F39 |
| Polycystic Ovarian Syndrome                                                                                                                        | E282                                                                                                                                            |
| Infertility                                                                                                                                        | N97                                                                                                                                             |
| Endometriosis                                                                                                                                      | N80                                                                                                                                             |
| Menorrhagia                                                                                                                                        | N92                                                                                                                                             |
| Abortion                                                                                                                                           | O03, O04, O06                                                                                                                                   |

| <b>Supplementary Table S2. Mapping of Sleep Questionnaire Answers to Sleep Quality Scores</b> |                        |              |
|-----------------------------------------------------------------------------------------------|------------------------|--------------|
| <b>Item</b>                                                                                   | <b>Answer Category</b> | <b>Score</b> |
| Sleep duration                                                                                | 7-8 h                  | 1            |
|                                                                                               | ≤ 4 h                  | 0            |
|                                                                                               | 5-6 h                  |              |
|                                                                                               | ≥ 9 h                  |              |
| Insomnia                                                                                      | Never/rarely           | 1            |
|                                                                                               | Sometimes              | 0            |
|                                                                                               | Often                  |              |
| Daytime dozing                                                                                | Never/rarely           | 1            |
|                                                                                               | Sometimes              |              |
|                                                                                               | Often                  | 0            |
| Chronotype                                                                                    | Morning                | 1            |
|                                                                                               | Evening                | 0            |
| Snoring                                                                                       | No                     | 1            |
|                                                                                               | Yes                    | 0            |

| <b>Supplementary Table S3. Classification of Shift Work Types Among All Currently Employed Participants at the Time of Recruitment</b> |                                                        |                                    |
|----------------------------------------------------------------------------------------------------------------------------------------|--------------------------------------------------------|------------------------------------|
| <b>Question 1: Does your work involve shift work?</b>                                                                                  | <b>Question 2: Does your job involve night shifts?</b> | <b>Shift work type</b>             |
| Never/rarely                                                                                                                           | -                                                      | No shift work (reference category) |
| Sometimes                                                                                                                              | Never/rarely                                           | Day shift                          |
|                                                                                                                                        | Sometimes                                              | Mixed shift                        |
|                                                                                                                                        | Usually                                                | Night shift                        |
|                                                                                                                                        | Always                                                 | Night shift                        |

|         |              |                       |
|---------|--------------|-----------------------|
| Usually | Never/rarely | Day shift             |
|         | Sometimes    | Mixed shift           |
|         | Usually      | Night shift           |
|         | Always       | Night shift           |
| Always  | Never/rarely | Day shift             |
|         | Sometimes    | Mixed shift           |
|         | Usually      | Night shift           |
|         | Always       | Permanent night shift |

**Supplementary Table S4.** Summary of GWAS Datasets for Sleep-Related Exposures and Female Reproductive Health Outcomes

| <b>Exposures</b>       | <b>IEU_ID</b>      | <b>Case</b> | <b>Control</b> | <b>Outcomes</b>          | <b>IEU_ID</b>            | <b>Case</b> | <b>Control</b> |
|------------------------|--------------------|-------------|----------------|--------------------------|--------------------------|-------------|----------------|
| daytime sleepiness     | ukb-b-5776         | 460913      |                | PCOS                     | ebi-a-GCST90044902       | 797         | 140558         |
| Sleep duration         | ukb-b-4424         | 460099      |                | Female infertility       | finn-b-N14_FEMALEINFERT  | 6481        | 68969          |
| long sleep duration    | ebi-a-GCST006685   | 10102       | 81204          | endometriosis            | ukb-b-10903              | 3809        | 459124         |
| short sleep duration   | ebi-a-GCST006686   | 28980       | 81208          | Spontaneous abortion     | finn-b-O15_ABORT_SPONTAN | 9113        | 89340          |
| Insomnia               | ebi-a-GCST90018869 | 1402        | 485225         | Menstrual-related issues | ukb-d-N94                | 1295        | 359899         |
| Morning/evening person | ukb-b-4956         | 413343      |                |                          |                          |             |                |
| Nap during day         | ukb-b-4616         | 462400      |                |                          |                          |             |                |

**Note:** GWAS, Genome-Wide Association Study. IEU, Instrumental Variables in Epidemiology. PCOS, Polycystic Ovarian Syndrome.

| <b>Supplementary Table S6. Baseline Characteristics of Participants</b> |              |                           |
|-------------------------------------------------------------------------|--------------|---------------------------|
| <b>Variable</b>                                                         | <b>Level</b> | <b>Overall (n=244561)</b> |
| No. of participants                                                     | -            | 244561                    |
| Age                                                                     | -            | 58.00 [51.00, 63.00]      |
| <b>Ethnic</b>                                                           |              |                           |
| 1 (White)                                                               | 1            | 232013 (94.9%)            |
| 2 (South Asian)                                                         | 2            | 3721 (1.5%)               |
| 3 (Black)                                                               | 3            | 4652 (1.9%)               |
| 4 (Other ethnic)                                                        | 4            | 4175 (1.7%)               |
| Townsend                                                                | -            | -2.20 [-3.67, 0.37]       |
| <b>Education</b>                                                        |              |                           |
| 0 (low education level )                                                | 0            | 152729 (62.5%)            |
| 1 (high education level)                                                | 1            | 91832 (37.5%)             |
| <b>Sleep duration</b>                                                   |              |                           |
| 1 ( $\leq 5$ h)                                                         | 1            | 15232 (6.2%)              |
| 2 (6h)                                                                  | 2            | 44842 (18.4%)             |
| 3 (7h)                                                                  | 3            | 92025 (37.7%)             |
| 4 (8h)                                                                  | 4            | 73476 (30.1%)             |
| 5 ( $\geq 9$ h)                                                         | 5            | 18600 (7.6%)              |
| <b>Smoking status</b>                                                   |              |                           |
| 0 (Never smoker)                                                        | 0            | 146273 (59.8%)            |
| 1 (Former smoker)                                                       | 1            | 77087 (31.5%)             |
| 2 (Current smoker)                                                      | 2            | 21201 (8.7%)              |
| <b>Drinking status</b>                                                  |              |                           |
| 0 (Non-drinkers)                                                        | 0            | 14023 (5.7%)              |
| 1 (Former drinkers)                                                     | 1            | 8546 (3.5%)               |
| 2 (Current drinkers)                                                    | 2            | 221992 (90.8%)            |
| BMI                                                                     | -            | 26.00 [23.38, 29.48]      |
| <b>Sleep score group</b>                                                |              |                           |
| 0 ( $\leq 2$ )                                                          | 0            | 44677 (21.8%)             |
| 1 (3)                                                                   | 1            | 79530 (38.8%)             |
| 2 ( $\geq 4$ )                                                          | 2            | 80757 (39.4%)             |
| <b>Type of shift work</b>                                               |              |                           |
| 0 (No shift work)                                                       | 0            | 111816 (85.5%)            |
| 1 (Day shift)                                                           | 1            | 10928 (8.4%)              |
| 2 (Mixed shift)                                                         | 2            | 4577 (3.5%)               |
| 3 (Night shift)                                                         | 3            | 1486 (1.1%)               |

|                           |   |                |
|---------------------------|---|----------------|
| 4 (Permanent night shift) | 4 | 2038 (1.6%)    |
| Hypertension              |   |                |
| 0 (No)                    | 0 | 184684 (75.5%) |
| 1 (Yes)                   | 1 | 59877 (24.5%)  |
| Diabetes                  |   |                |
| 0 (No)                    | 0 | 239669 (98.0%) |
| 1 (Yes)                   | 1 | 4892 (2.0%)    |
| Family depression         |   |                |
| 0 (No)                    | 0 | 208549 (85.3%) |
| 1 (Yes)                   | 1 | 36012 (14.7%)  |

**Note:** Data are presented as median [interquartile range] for continuous variables and n (%) for categorical variables. BMI: Body Mass Index.



|                                  |               |               |               |               |               |                |        |
|----------------------------------|---------------|---------------|---------------|---------------|---------------|----------------|--------|
| <b>0 (<math>\leq 2</math>)</b>   | 6002 (51.4%)  | 18166 (49.1%) | 7033 (9.0%)   | 5552 (8.8%)   | 7924 (50.5%)  | 44677 (21.8%)  |        |
| <b>1 (3)</b>                     | 5476 (46.9%)  | 17351 (46.9%) | 28810 (37.0%) | 21841 (34.8%) | 6052 (38.6%)  | 79530 (38.8%)  |        |
| <b>2 (<math>\geq 4</math>)</b>   | 209 (1.8%)    | 1495 (4.0%)   | 41955 (53.9%) | 35378 (56.4%) | 1720 (11.0%)  | 80757 (39.4%)  |        |
| <b>Type of Shift Work</b>        |               |               |               |               |               |                | 0.0000 |
| <b>0 (No shift work)</b>         | 5022 (76.0%)  | 20696 (83.0%) | 48088 (87.1%) | 32593 (86.8%) | 5417 (82.2%)  | 111816 (85.5%) |        |
| <b>1 (Day shift)</b>             | 761 (11.5%)   | 2301 (9.2%)   | 4273 (7.7%)   | 2944 (7.8%)   | 649 (9.9%)    | 10928 (8.4%)   |        |
| <b>2 (Mixed shift)</b>           | 398 (6.0%)    | 1023 (4.1%)   | 1726 (3.1%)   | 1160 (3.1%)   | 270 (4.1%)    | 4577 (3.5%)    |        |
| <b>3 (Night shift)</b>           | 157 (2.4%)    | 375 (1.5%)    | 488 (0.9%)    | 360 (1.0%)    | 106 (1.6%)    | 1486 (1.1%)    |        |
| <b>4 (Permanent night shift)</b> | 266 (4.0%)    | 543 (2.2%)    | 611 (1.1%)    | 473 (1.3%)    | 145 (2.2%)    | 2038 (1.6%)    |        |
| <b>Hypertension</b>              |               |               |               |               |               |                | 0.0000 |
| <b>0 (No)</b>                    | 10211 (67.0%) | 32896 (73.4%) | 71435 (77.6%) | 56556 (77.0%) | 13290 (71.5%) | 184388 (75.5%) |        |
| <b>1 (Yes)</b>                   | 5021 (33.0%)  | 11946 (26.6%) | 20590 (22.4%) | 16920 (23.0%) | 5310 (28.5%)  | 59787 (24.5%)  |        |
| <b>Diabetes</b>                  |               |               |               |               |               |                | 0.0000 |
| <b>0 (No)</b>                    | 14723 (96.7%) | 43912 (97.9%) | 90486 (98.3%) | 72164 (98.2%) | 18021 (96.9%) | 239306 (98.0%) |        |
| <b>1 (Yes)</b>                   | 509 (3.3%)    | 930 (2.1%)    | 1539 (1.7%)   | 1312 (1.8%)   | 579 (3.1%)    | 4869 (2.0%)    |        |
| <b>Family Depression</b>         |               |               |               |               |               |                | 0.0000 |
| <b>0 (No)</b>                    | 12734 (83.6%) | 38062 (84.9%) | 78883 (85.7%) | 62974 (85.7%) | 15499 (83.3%) | 208152 (85.2%) |        |
| <b>1 (Yes)</b>                   | 2498 (16.4%)  | 6780 (15.1%)  | 13142 (14.3%) | 10502 (14.3%) | 3101 (16.7%)  | 36023 (14.8%)  |        |

Note: Data are presented as median [interquartile range] for continuous variables and n (%) for categorical variables. BMI: Body Mass Index.

**Supplementary Table S8. Baseline Characteristics of Participants by Sleep Score Based on Imputed Data Analysis**

| Variable                 | $\leq 2$         | 3                | $\geq 4$         | Total            | <i>p</i> |
|--------------------------|------------------|------------------|------------------|------------------|----------|
|                          | N=44677          | N=79530          | N=80757          | N=204964         |          |
| Age (years)              | 58.0 [52.0;63.0] | 58.0 [51.0;63.0] | 57.0 [49.0;63.0] | 58.0 [51.0;63.0] | 0.000    |
| Ethnic                   |                  |                  |                  |                  | 0.000    |
| 1 (White)                | 42209 (94.5%)    | 75990 (95.5%)    | 77336 (95.8%)    | 195535 (95.4%)   |          |
| 2 (South Asian)          | 839 (1.9%)       | 1024 (1.3%)      | 989 (1.2%)       | 2852 (1.4%)      |          |
| 3 (Black)                | 836 (1.9%)       | 1370 (1.7%)      | 1424 (1.8%)      | 3630 (1.8%)      |          |
| 4 (Other ethnic)         | 793 (1.8%)       | 1146 (1.4%)      | 1008 (1.2%)      | 2947 (1.4%)      |          |
| Townsend                 | -2.0 [-3.6;0.8]  | -2.3 [-3.7;0.2]  | -2.4 [-3.8;-0.1] | -2.2 [-3.7;0.4]  | 0.000    |
| Education                |                  |                  |                  |                  | 0.000    |
| 0 (low education level)  | 29641 (66.3%)    | 50554 (63.6%)    | 47758 (59.1%)    | 127953 (62.4%)   |          |
| 1 (high education level) | 15036 (33.7%)    | 28976 (36.4%)    | 32999 (40.9%)    | 77011 (37.6%)    |          |
| Sleep Length Group       |                  |                  |                  |                  | 0.000    |
| 1 ( $\leq 5$ h)          | 6002 (13.4%)     | 5476 (6.9%)      | 209 (0.3%)       | 11687 (5.7%)     |          |
| 2 (6h)                   | 18166 (40.7%)    | 17351 (21.8%)    | 1495 (1.9%)      | 37012 (18.1%)    |          |
| 3 (7h)                   | 7033 (15.7%)     | 28810 (36.2%)    | 41955 (52.0%)    | 77798 (38.0%)    |          |
| 4 (8h)                   | 5552 (12.4%)     | 21841 (27.5%)    | 35378 (43.8%)    | 62771 (30.6%)    |          |
| 5 ( $\geq 9$ h)          | 7924 (17.7%)     | 6052 (7.6%)      | 1720 (2.1%)      | 15696 (7.7%)     |          |
| Smoking Status           |                  |                  |                  |                  | 0.000    |
| 0 (Never smoker)         | 23640 (52.9%)    | 46591 (58.6%)    | 51915 (64.3%)    | 122146 (59.6%)   |          |
| 1 (Former smoker)        | 15230 (34.1%)    | 26162 (32.9%)    | 23954 (29.7%)    | 65346 (31.9%)    |          |
| 2 (Current smoker)       | 5807 (13.0%)     | 6777 (8.5%)      | 4888 (6.1%)      | 17472 (8.5%)     |          |
| Drinking Status          |                  |                  |                  |                  | 0.000    |

|                                                                                                                                              |                  |                  |                  |                  |       |
|----------------------------------------------------------------------------------------------------------------------------------------------|------------------|------------------|------------------|------------------|-------|
| 0 (Non-drinkers)                                                                                                                             | 2380 (5.3%)      | 4190 (5.3%)      | 4543 (5.6%)      | 11113 (5.4%)     |       |
| 1 (Former drinkers)                                                                                                                          | 1790 (4.0%)      | 2635 (3.3%)      | 2475 (3.1%)      | 6900 (3.4%)      |       |
| 2 (Current drinkers)                                                                                                                         | 40507 (90.7%)    | 72705 (91.4%)    | 73739 (91.3%)    | 186951 (91.2%)   |       |
| <b>BMI (kg/m<sup>2</sup>)</b>                                                                                                                | 27.3 [24.4;31.2] | 26.1 [23.5;29.5] | 25.2 [22.9;28.3] | 26.0 [23.4;29.5] | 0.000 |
| <b>Type of Shift Work</b>                                                                                                                    |                  |                  |                  |                  | 0.000 |
| 0 (No shift work)                                                                                                                            | 18383 (81.8%)    | 36154 (85.9%)    | 40706 (87.6%)    | 95243 (85.8%)    |       |
| 1 (Day shift)                                                                                                                                | 2179 (9.7%)      | 3433 (8.2%)      | 3510 (7.6%)      | 9122 (8.2%)      |       |
| 2 (Mixed shift)                                                                                                                              | 979 (4.4%)       | 1414 (3.4%)      | 1387 (3.0%)      | 3780 (3.4%)      |       |
| 3 (Night shift)                                                                                                                              | 358 (1.6%)       | 451 (1.1%)       | 389 (0.8%)       | 1198 (1.1%)      |       |
| 4 (Permanent night shift)                                                                                                                    | 577 (2.6%)       | 627 (1.5%)       | 456 (1.0%)       | 1660 (1.5%)      |       |
| <b>Hypertension</b>                                                                                                                          |                  |                  |                  |                  | 0.000 |
| 0 (No)                                                                                                                                       | 31177 (69.8%)    | 59679 (75.0%)    | 64393 (79.7%)    | 155249 (75.7%)   |       |
| 1 (Yes)                                                                                                                                      | 13500 (30.2%)    | 19851 (25.0%)    | 16364 (20.3%)    | 49715 (24.3%)    |       |
| <b>Diabetes</b>                                                                                                                              |                  |                  |                  |                  | 0.000 |
| 0 (No)                                                                                                                                       | 43319 (97.0%)    | 78057 (98.1%)    | 79590 (98.6%)    | 200966 (98.0%)   |       |
| 1 (Yes)                                                                                                                                      | 1358 (3.0%)      | 1473 (1.9%)      | 1167 (1.4%)      | 3998 (2.0%)      |       |
| <b>Family Depression</b>                                                                                                                     |                  |                  |                  |                  | 0.000 |
| 0 (No)                                                                                                                                       | 36866 (82.5%)    | 67698 (85.1%)    | 69872 (86.5%)    | 174436 (85.1%)   |       |
| 1 (Yes)                                                                                                                                      | 7811 (17.5%)     | 11832 (14.9%)    | 10885 (13.5%)    | 30528 (14.9%)    |       |
| Note: Data are presented as median [interquartile range] for continuous variables and n (%) for categorical variables. BMI: Body Mass Index. |                  |                  |                  |                  |       |

**Supplementary Table S9.** Baseline Characteristics of Participants by Type of Shift Work Based on Imputed Data Analysis

| Variable                        | No shift work    | Day shift        | Mixed shift      | Night shift      | Permanent night shift | Total            | <i>p</i> |
|---------------------------------|------------------|------------------|------------------|------------------|-----------------------|------------------|----------|
|                                 | N=111816         | N=10928          | N=4577           | N=1486           | N=2038                | N=130845         |          |
| Age (years)                     | 53.0 [47.0;58.0] | 53.0 [47.0;58.0] | 51.0 [46.0;56.0] | 51.0 [46.0;57.0] | 52.0 [46.0;57.0]      | 58.0 [51.0;63.0] | 0.000    |
| Ethnic                          |                  |                  |                  |                  |                       |                  | 0.000    |
| <b>1 (White)</b>                | 106644 (95.4%)   | 10029 (91.8%)    | 3982 (87.0%)     | 1224 (82.4%)     | 1767 (86.7%)          | 123646 (94.5%)   |          |
| <b>2 (South Asian)</b>          | 1598 (1.4%)      | 275 (2.5%)       | 271 (5.9%)       | 119 (8.0%)       | 128 (6.3%)            | 2391 (1.8%)      |          |
| <b>3 (Black)</b>                | 1947 (1.7%)      | 344 (3.1%)       | 141 (3.1%)       | 69 (4.6%)        | 50 (2.5%)             | 2551 (1.9%)      |          |
| <b>4 (Other ethnic)</b>         | 1627 (1.5%)      | 280 (2.6%)       | 183 (4.0%)       | 74 (5.0%)        | 93 (4.6%)             | 2257 (1.7%)      |          |
| Townsend                        | -2.2 [-3.7; 0.2] | -1.5 [-3.2; 1.4] | -1.2 [-3.2; 1.7] | -1.2 [-3.2; 2.0] | -1.1 [-3.1; 1.9]      | -2.2 [-3.7; 0.4] | 0.000    |
| Education level                 |                  |                  |                  |                  |                       |                  | 0.000    |
| <b>0 (low education level)</b>  | 63293 (56.6%)    | 7429 (68.0%)     | 3082 (67.3%)     | 1114 (75.0%)     | 1572 (77.1%)          | 76490 (58.5%)    |          |
| <b>1 (high education level)</b> | 48523 (43.4%)    | 3499 (32.0%)     | 1495 (32.7%)     | 372 (25.0%)      | 466 (22.9%)           | 54355 (41.5%)    |          |
| Sleep duration                  |                  |                  |                  |                  |                       |                  | 0.000    |
| <b>1 (≤5h)</b>                  | 5022 (4.5%)      | 761 (7.0%)       | 398 (8.7%)       | 157 (10.6%)      | 266 (13.1%)           | 6604 (5.0%)      |          |
| <b>2 (6h)</b>                   | 20696 (18.5%)    | 2301 (21.1%)     | 1023 (22.4%)     | 375 (25.2%)      | 543 (26.6%)           | 24938 (19.1%)    |          |
| <b>3 (7h)</b>                   | 48088 (43.0%)    | 4273 (39.1%)     | 1726 (37.7%)     | 488 (32.8%)      | 611 (30.0%)           | 55186 (42.2%)    |          |
| <b>4 (8h)</b>                   | 32593 (29.1%)    | 2944 (26.9%)     | 1160 (25.3%)     | 360 (24.2%)      | 473 (23.2%)           | 37530 (28.7%)    |          |
| <b>5 (≥9h)</b>                  | 5417 (4.8%)      | 649 (5.9%)       | 270 (5.9%)       | 106 (7.1%)       | 145 (7.1%)            | 6587 (5.0%)      |          |



|                                                                                                                                              |               |              |              |              |              |                |  |
|----------------------------------------------------------------------------------------------------------------------------------------------|---------------|--------------|--------------|--------------|--------------|----------------|--|
| 0 (No)                                                                                                                                       | 94842 (84.8%) | 9096 (83.2%) | 3864 (84.4%) | 1265 (85.1%) | 1730 (84.9%) | 110797 (84.7%) |  |
| 1 (Yes)                                                                                                                                      | 16974 (15.2%) | 1832 (16.8%) | 713 (15.6%)  | 221 (14.9%)  | 308 (15.1%)  | 20048 (15.3%)  |  |
| Note: Data are presented as median [interquartile range] for continuous variables and n (%) for categorical variables. BMI: Body Mass Index. |               |              |              |              |              |                |  |

| <b>Supplementary Table S10. Baseline Characteristics of Participants by Sleep Duration Group Based on Complete Data Analysis</b> |                  |                  |                  |                  |                  |                  |         |
|----------------------------------------------------------------------------------------------------------------------------------|------------------|------------------|------------------|------------------|------------------|------------------|---------|
| Variable                                                                                                                         | ≤5h              | 6h               | 7h               | 8h               | ≥9               | Total            | p-value |
|                                                                                                                                  | N=9889           | N=34666          | N=76626          | N=58828          | N=13405          | N=193414)        |         |
| Age (years)                                                                                                                      | 58.0 [51.0;63.0] | 57.0 [51.0;62.0] | 56.0 [49.0;62.0] | 57.0 [49.0;62.0] | 58.0 [50.0;63.0] | 57.0 [49.0;62.0] | 0       |
| Ethnic                                                                                                                           |                  |                  |                  |                  |                  |                  |         |
| 1 (White)                                                                                                                        | 8880 (89.8%)     | 32297 (93.2%)    | 73409 (95.8%)    | 56507 (96.1%)    | 12769 (95.3%)    | 183862 (95.1%)   | 0       |
| 2 (South Asian)                                                                                                                  | 473 (4.8%)       | 863 (2.5%)       | 889 (1.2%)       | 622 (1.1%)       | 173 (1.3%)       | 3020 (1.6%)      |         |
| 3 (Black)                                                                                                                        | 249 (2.5%)       | 760 (2.2%)       | 1323 (1.7%)      | 900 (1.5%)       | 251 (1.9%)       | 3483 (1.8%)      |         |
| 4 (Other ethnic)                                                                                                                 | 287 (2.9%)       | 746 (2.2%)       | 1005 (1.3%)      | 799 (1.4%)       | 212 (1.6%)       | 3049 (1.6%)      |         |
| Townsend                                                                                                                         | -1.8 [-3.5;1.2]  | -2.2 [-3.7;0.4]  | -2.4 [-3.8;-0.0] | -2.5 [-3.8;-0.2] | -2.3 [-3.7;0.2]  | -2.4 [-3.8;0.0]  | 0       |
| Education                                                                                                                        |                  |                  |                  |                  |                  |                  |         |
| 0 (low education level)                                                                                                          | 7136 (72.2%)     | 22051 (63.6%)    | 44672 (58.3%)    | 36150 (61.5%)    | 8969 (66.9%)     | 118978 (61.5%)   | 0       |
| 1 (high education level)                                                                                                         | 2753 (27.8%)     | 12615 (36.4%)    | 31954 (41.7%)    | 22678 (38.5%)    | 4436 (33.1%)     | 74436 (38.5%)    |         |
| Smoking status                                                                                                                   |                  |                  |                  |                  |                  |                  |         |
| 0 (Never smoker)                                                                                                                 | 5839 (59.0%)     | 20600 (59.4%)    | 47686 (62.2%)    | 36802 (62.6%)    | 8063 (60.1%)     | 118990 (61.5%)   | 0       |

|                               |                  |                  |                  |                  |                  |                  |   |
|-------------------------------|------------------|------------------|------------------|------------------|------------------|------------------|---|
| 1 (Former smoker)             | 2997 (30.3%)     | 11064 (31.9%)    | 23427 (30.6%)    | 17859 (30.4%)    | 4183 (31.2%)     | 59530 (30.8%)    |   |
| 2 (Current smoker)            | 1053 (10.6%)     | 3002 (8.7%)      | 5513 (7.2%)      | 4167 (7.1%)      | 1159 (8.6%)      | 14894 (7.7%)     |   |
| <b>Drinking status</b>        |                  |                  |                  |                  |                  |                  |   |
| 0 (Non-drinkers)              | 819 (8.3%)       | 1858 (5.4%)      | 3122 (4.1%)      | 2620 (4.5%)      | 809 (6.0%)       | 9228 (4.8%)      | 0 |
| 1 (Former drinkers)           | 533 (5.4%)       | 1158 (3.3%)      | 1998 (2.6%)      | 1613 (2.7%)      | 589 (4.4%)       | 5891 (3.0%)      |   |
| 2 (Current drinkers)          | 8537 (86.3%)     | 31650 (91.3%)    | 71506 (93.3%)    | 54595 (92.8%)    | 12007 (89.6%)    | 178295 (92.2%)   |   |
| <b>BMI (kg/m<sup>2</sup>)</b> | 26.9 [23.9;31.0] | 26.0 [23.3;29.7] | 25.5 [23.0;28.8] | 25.6 [23.1;28.8] | 26.4 [23.7;30.0] | 25.7 [23.2;29.1] | 0 |
| <b>Sleep Score Category</b>   |                  |                  |                  |                  |                  |                  |   |
| 0 ( $\leq 2$ )                | 3927 (50.6%)     | 14017 (48.7%)    | 5717 (8.8%)      | 4235 (8.4%)      | 5564 (48.9%)     | 33460 (20.5%)    | 0 |
| 1 (3)                         | 3691 (47.5%)     | 13503 (46.9%)    | 23887 (36.8%)    | 17266 (34.2%)    | 4455 (39.2%)     | 62802 (38.4%)    |   |
| 2 ( $\geq 4$ )                | 145 (1.9%)       | 1251 (4.3%)      | 35389 (54.5%)    | 29043 (57.5%)    | 1359 (11.9%)     | 67187 (41.1%)    |   |
| <b>Type of Shift Work</b>     |                  |                  |                  |                  |                  |                  |   |
| 0 (No shift work)             | 3989 (76.4%)     | 17866 (83.3%)    | 43258 (87.4%)    | 28797 (87.0%)    | 4592 (82.3%)     | 98502 (85.8%)    | 0 |
| 1 (Day shift)                 | 575 (11.0%)      | 1922 (9.0%)      | 3703 (7.5%)      | 2532 (7.6%)      | 522 (9.4%)       | 9254 (8.1%)      |   |
| 2 (Mixed shift)               | 337 (6.5%)       | 886 (4.1%)       | 1554 (3.1%)      | 1052 (3.2%)      | 243 (4.4%)       | 4072 (3.5%)      |   |
| 3 (Night shift)               | 123 (2.4%)       | 324 (1.5%)       | 433 (0.9%)       | 327 (1.0%)       | 95 (1.7%)        | 1302 (1.1%)      |   |
| 4 (Permanent night shift)     | 200 (3.8%)       | 451 (2.1%)       | 538 (1.1%)       | 410 (1.2%)       | 125 (2.2%)       | 1724 (1.5%)      |   |
| <b>Hypertension</b>           |                  |                  |                  |                  |                  |                  |   |
| 0 (No)                        | 6959 (70.4%)     | 26272 (75.8%)    | 61014 (79.6%)    | 46586 (79.2%)    | 9987 (74.5%)     | 150818 (78.0%)   | 0 |
| 1 (Yes)                       | 2930 (29.6%)     | 8394 (24.2%)     | 15612 (20.4%)    | 12242 (20.8%)    | 3418 (25.5%)     | 42596 (22.0%)    |   |
| <b>Diabetes</b>               |                  |                  |                  |                  |                  |                  |   |

|                          |              |               |               |               |               |                |   |
|--------------------------|--------------|---------------|---------------|---------------|---------------|----------------|---|
| 0 (No)                   | 9611 (97.2%) | 34024 (98.1%) | 75483 (98.5%) | 57936 (98.5%) | 13049 (97.3%) | 190103 (98.3%) | 0 |
| 1 (Yes)                  | 278 (2.8%)   | 642 (1.9%)    | 1143 (1.5%)   | 892 (1.5%)    | 356 (2.7%)    | 3311 (1.7%)    |   |
| <b>Family Depression</b> |              |               |               |               |               |                |   |
| 0 (No)                   | 8138 (82.3%) | 29211 (84.3%) | 65351 (85.3%) | 50114 (85.2%) | 11029 (82.3%) | 163843 (84.7%) | 0 |
| 1 (Yes)                  | 1751 (17.7%) | 5455 (15.7%)  | 11275 (14.7%) | 8714 (14.8%)  | 2376 (17.7%)  | 29571 (15.3%)  |   |

**Note:** Data are presented as median [interquartile range] for continuous variables and n (%) for categorical variables. BMI: Body Mass Index.

| <b>Supplementary Table S11. Baseline Characteristics of Participants by Sleep Score Group Based on Complete Data Analysis</b> |                  |                  |                  |                  |         |
|-------------------------------------------------------------------------------------------------------------------------------|------------------|------------------|------------------|------------------|---------|
| Variable                                                                                                                      | ≤2               | 3                | ≥4               | Total            | p-value |
|                                                                                                                               | N=33460          | N=62802          | N=67187          | N=163449         |         |
| Age (years)                                                                                                                   | 57.0 [50.0;62.0] | 57.0 [50.0;62.0] | 55.0 [48.0;62.0] | 57.0 [49.0;62.0] | 0       |
| <b>Ethnic</b>                                                                                                                 |                  |                  |                  |                  |         |
| 1 (White)                                                                                                                     | 31524 (94.2%)    | 59936 (95.4%)    | 64378 (95.8%)    | 155838 (95.3%)   | 0       |
| 2 (South Asian)                                                                                                               | 676 (2.0%)       | 845 (1.3%)       | 840 (1.3%)       | 2361 (1.4%)      |         |
| 3 (Black)                                                                                                                     | 626 (1.9%)       | 1063 (1.7%)      | 1126 (1.7%)      | 2815 (1.7%)      |         |
| 4 (Other ethnic)                                                                                                              | 634 (1.9%)       | 958 (1.5%)       | 843 (1.3%)       | 2435 (1.5%)      |         |
| Townsend                                                                                                                      | -2.2 [-3.7;0.4]  | -2.4 [-3.8;-0.1] | -2.5 [-3.8;-0.3] | -2.4 [-3.8;0.0]  | 0       |
| <b>Education</b>                                                                                                              |                  |                  |                  |                  |         |
| 0 (low education level)                                                                                                       | 22099 (66.0%)    | 39491 (62.9%)    | 38949 (58.0%)    | 100539 (61.5%)   | 0       |

|                               |                  |                  |                  |                  |   |
|-------------------------------|------------------|------------------|------------------|------------------|---|
| 1 (high education level)      | 11361 (34.0%)    | 23311 (37.1%)    | 28238 (42.0%)    | 62910 (38.5%)    |   |
| <b>Sleep Length Group</b>     |                  |                  |                  |                  |   |
| 1 ( $\leq 5$ h)               | 3927 (11.7%)     | 3691 (5.9%)      | 145 (0.2%)       | 7763 (4.7%)      | 0 |
| 2 (6h)                        | 14017 (41.9%)    | 13503 (21.5%)    | 1251 (1.9%)      | 28771 (17.6%)    |   |
| 3 (7h)                        | 5717 (17.1%)     | 23887 (38.0%)    | 35389 (52.7%)    | 64993 (39.8%)    |   |
| 4 (8h)                        | 4235 (12.7%)     | 17266 (27.5%)    | 29043 (43.2%)    | 50544 (30.9%)    |   |
| 5 ( $\geq 9$ h)               | 5564 (16.6%)     | 4455 (7.1%)      | 1359 (2.0%)      | 11378 (7.0%)     |   |
| <b>Smoking Status</b>         |                  |                  |                  |                  |   |
| 0 (Never smoker)              | 18463 (55.2%)    | 37803 (60.2%)    | 44065 (65.6%)    | 100331 (61.4%)   | 0 |
| 1 (Former smoker)             | 11136 (33.3%)    | 20236 (32.2%)    | 19421 (28.9%)    | 50793 (31.1%)    |   |
| 2 (Current smoker)            | 3861 (11.5%)     | 4763 (7.6%)      | 3701 (5.5%)      | 12325 (7.5%)     |   |
| <b>Drinking Status</b>        |                  |                  |                  |                  |   |
| 0 (Non-drinkers)              | 1532 (4.6%)      | 2777 (4.4%)      | 3185 (4.7%)      | 7494 (4.6%)      | 0 |
| 1 (Former drinkers)           | 1134 (3.4%)      | 1829 (2.9%)      | 1839 (2.7%)      | 4802 (2.9%)      |   |
| 2 (Current drinkers)          | 30794 (92.0%)    | 58196 (92.7%)    | 62163 (92.5%)    | 151153 (92.5%)   |   |
| <b>BMI (kg/m<sup>2</sup>)</b> | 27.1 [24.2;31.0] | 25.8 [23.3;29.2] | 25.0 [22.7;28.0] | 25.7 [23.2;29.1] | 0 |
| <b>Type of Shift Work</b>     |                  |                  |                  |                  |   |
| 0 (No shift work)             | 15569 (82.1%)    | 31674 (86.2%)    | 36909 (87.8%)    | 84152 (86.1%)    | 0 |
| 1 (Day shift)                 | 1765 (9.3%)      | 2888 (7.9%)      | 3095 (7.4%)      | 7748 (7.9%)      |   |
| 2 (Mixed shift)               | 849 (4.5%)       | 1257 (3.4%)      | 1280 (3.0%)      | 3386 (3.5%)      |   |
| 3 (Night shift)               | 302 (1.6%)       | 403 (1.1%)       | 354 (0.8%)       | 1059 (1.1%)      |   |
| 4 (Permanent night shift)     | 471 (2.5%)       | 538 (1.5%)       | 409 (1.0%)       | 1418 (1.5%)      |   |

|                                                                                                                                              |               |               |               |                |   |
|----------------------------------------------------------------------------------------------------------------------------------------------|---------------|---------------|---------------|----------------|---|
| Hypertension                                                                                                                                 |               |               |               |                |   |
| 0 (No)                                                                                                                                       | 24227 (72.4%) | 48601 (77.4%) | 54929 (81.8%) | 127757 (78.2%) | 0 |
| 1 (Yes)                                                                                                                                      | 9233 (27.6%)  | 14201 (22.6%) | 12258 (18.2%) | 35692 (21.8%)  |   |
| Diabetes                                                                                                                                     |               |               |               |                |   |
| 0 (No)                                                                                                                                       | 32577 (97.4%) | 61793 (98.4%) | 66332 (98.7%) | 160702 (98.3%) | 0 |
| 1 (Yes)                                                                                                                                      | 883 (2.6%)    | 1009 (1.6%)   | 855 (1.3%)    | 2747 (1.7%)    |   |
| Family Depression                                                                                                                            |               |               |               |                |   |
| 0 (No)                                                                                                                                       | 27320 (81.6%) | 53135 (84.6%) | 57841 (86.1%) | 138296 (84.6%) | 0 |
| 1 (Yes)                                                                                                                                      | 6140 (18.4%)  | 9667 (15.4%)  | 9346 (13.9%)  | 25153 (15.4%)  |   |
| Note: Data are presented as median [interquartile range] for continuous variables and n (%) for categorical variables. BMI: Body Mass Index. |               |               |               |                |   |

| <b>Supplementary Table S12. Baseline Characteristics of Participants by Type of Shift Work Based on Complete Data Analysis</b> |                     |                  |                  |                  |                       |                  |         |
|--------------------------------------------------------------------------------------------------------------------------------|---------------------|------------------|------------------|------------------|-----------------------|------------------|---------|
| Variable                                                                                                                       | No shift work       | Day shift        | Mixed shift      | Night shift      | Permanent night shift | Total            | p-value |
|                                                                                                                                | N=98502             | N=9254           | N=4072           | N=1302           | N=1724                | N=114854         |         |
| Age (years)                                                                                                                    | 52.0<br>[47.0;57.0] | 52.0 [47.0;57.0] | 51.0 [45.5;56.0] | 50.0 [45.0;56.0] | 51.0 [46.0;57.0]      | 57.0 [49.0;62.0] | 0       |
| Ethnic                                                                                                                         |                     |                  |                  |                  |                       |                  |         |
| 1 (White)                                                                                                                      | 93957 (95.4%)       | 8513 (92.0%)     | 3545 (87.1%)     | 1080 (82.9%)     | 1493 (86.6%)          | 108588 (94.5%)   | 0       |
| 2 (South Asian)                                                                                                                | 1432 (1.5%)         | 234 (2.5%)       | 247 (6.1%)       | 106 (8.1%)       | 113 (6.6%)            | 2132 (1.9%)      |         |

|                          |                     |                  |                  |                  |                  |                  |   |
|--------------------------|---------------------|------------------|------------------|------------------|------------------|------------------|---|
| 3 (Black)                | 1686 (1.7%)         | 271 (2.9%)       | 122 (3.0%)       | 58 (4.5%)        | 38 (2.2%)        | 2175 (1.9%)      |   |
| 4 (Other ethnic)         | 1427 (1.4%)         | 236 (2.6%)       | 158 (3.9%)       | 58 (4.5%)        | 80 (4.6%)        | 1959 (1.7%)      |   |
| Townsend                 | -2.3 [-3.7;0.1]     | -1.6 [-3.3;1.2]  | -1.4 [-3.2;1.6]  | -1.2 [-3.2;1.8]  | -1.3 [-3.2;1.7]  | -2.4 [-3.8;0.0]  | 0 |
| Education level          |                     |                  |                  |                  |                  |                  |   |
| 0 (low education level)  | 54933 (55.8%)       | 6386 (69.0%)     | 2754 (67.6%)     | 997 (76.6%)      | 1373 (79.6%)     | 66443 (57.8%)    | 0 |
| 1 (high education level) | 43569 (44.2%)       | 2868 (31.0%)     | 1318 (32.4%)     | 305 (23.4%)      | 351 (20.4%)      | 48411 (42.2%)    |   |
| Sleep duration           |                     |                  |                  |                  |                  |                  |   |
| 1 ( $\leq 5$ h)          | 3989 (4.0%)         | 575 (6.2%)       | 337 (8.3%)       | 123 (9.4%)       | 200 (11.6%)      | 5224 (4.5%)      | 0 |
| 2 (6h)                   | 17866 (18.1%)       | 1922 (20.8%)     | 886 (21.8%)      | 324 (24.9%)      | 451 (26.2%)      | 21449 (18.7%)    |   |
| 3 (7h)                   | 43258 (43.9%)       | 3703 (40.0%)     | 1554 (38.2%)     | 433 (33.3%)      | 538 (31.2%)      | 49486 (43.1%)    |   |
| 4 (8h)                   | 28797 (29.2%)       | 2532 (27.4%)     | 1052 (25.8%)     | 327 (25.1%)      | 410 (23.8%)      | 33118 (28.8%)    |   |
| 5 ( $\geq 9$ h)          | 4592 (4.7%)         | 522 (5.6%)       | 243 (6.0%)       | 95 (7.3%)        | 125 (7.3%)       | 5577 (4.9%)      |   |
| Smoking status           |                     |                  |                  |                  |                  |                  |   |
| 0 (Never smoker)         | 61738 (62.7%)       | 5382 (58.2%)     | 2379 (58.4%)     | 792 (60.8%)      | 985 (57.1%)      | 71276 (62.1%)    | 0 |
| 1 (Former smoker)        | 29131 (29.6%)       | 2809 (30.4%)     | 1142 (28.0%)     | 325 (25.0%)      | 456 (26.5%)      | 33863 (29.5%)    |   |
| 2 (Current smoker)       | 7633 (7.7%)         | 1063 (11.5%)     | 551 (13.5%)      | 185 (14.2%)      | 283 (16.4%)      | 9715 (8.5%)      |   |
| Drinking status          |                     |                  |                  |                  |                  |                  |   |
| 0 (Non-drinkers)         | 3445 (3.5%)         | 487 (5.3%)       | 277 (6.8%)       | 121 (9.3%)       | 171 (9.9%)       | 4501 (3.9%)      | 0 |
| 1 (Former drinkers)      | 2395 (2.4%)         | 296 (3.2%)       | 124 (3.0%)       | 43 (3.3%)        | 66 (3.8%)        | 2924 (2.5%)      |   |
| 2 (Current drinkers)     | 92662 (94.1%)       | 8471 (91.5%)     | 3671 (90.2%)     | 1138 (87.4%)     | 1487 (86.3%)     | 107429 (93.5%)   |   |
| BMI (kg/m <sup>2</sup> ) | 25.4<br>[22.9;28.8] | 26.0 [23.4;29.8] | 26.3 [23.4;30.3] | 26.6 [23.8;30.5] | 27.1 [24.1;31.2] | 25.7 [23.2;29.1] | 0 |

|                   |               |              |              |              |              |                |       |
|-------------------|---------------|--------------|--------------|--------------|--------------|----------------|-------|
| Sleep score       |               |              |              |              |              |                |       |
| 0 ( $\leq 2$ )    | 15569 (18.5%) | 1765 (22.8%) | 849 (25.1%)  | 302 (28.5%)  | 471 (33.2%)  | 18956 (19.4%)  | 0     |
| 1 (3)             | 31674 (37.6%) | 2888 (37.3%) | 1257 (37.1%) | 403 (38.1%)  | 538 (37.9%)  | 36760 (37.6%)  |       |
| 2 ( $\geq 4$ )    | 36909 (43.9%) | 3095 (39.9%) | 1280 (37.8%) | 354 (33.4%)  | 409 (28.8%)  | 42047 (43.0%)  |       |
| Hypertension      |               |              |              |              |              |                |       |
| 0 (No)            | 81912 (83.2%) | 7534 (81.4%) | 3360 (82.5%) | 1072 (82.3%) | 1406 (81.6%) | 95284 (83.0%)  | 0     |
| 1 (Yes)           | 16590 (16.8%) | 1720 (18.6%) | 712 (17.5%)  | 230 (17.7%)  | 318 (18.4%)  | 19570 (17.0%)  |       |
| Diabetes          |               |              |              |              |              |                |       |
| 0 (No)            | 97279 (98.8%) | 9105 (98.4%) | 4012 (98.5%) | 1274 (97.8%) | 1695 (98.3%) | 113365 (98.7%) | 0.001 |
| 1 (Yes)           | 1223 (1.2%)   | 149 (1.6%)   | 60 (1.5%)    | 28 (2.2%)    | 29 (1.7%)    | 1489 (1.3%)    |       |
| Family depression |               |              |              |              |              |                |       |
| 0 (No)            | 83273 (84.5%) | 7672 (82.9%) | 3429 (84.2%) | 1109 (85.2%) | 1457 (84.5%) | 96940 (84.4%)  | 0.001 |
| 1 (Yes)           | 15229 (15.5%) | 1582 (17.1%) | 643 (15.8%)  | 193 (14.8%)  | 267 (15.5%)  | 17914 (15.6%)  |       |

Note: Data are presented as median [interquartile range] for continuous variables and n (%) for categorical variables. BMI: Body Mass Index.

| <b>Supplementary Table S13.1.</b> The Association Between Sleep Duration and the Risk of Reproductive Endocrine Diseases: Model 1 (Adjusted for Age, Socioeconomic Factors, Lifestyle Factors, and BMI) Based on Imputed Data Analysis |           |                    |                          |
|----------------------------------------------------------------------------------------------------------------------------------------------------------------------------------------------------------------------------------------|-----------|--------------------|--------------------------|
| Variable                                                                                                                                                                                                                               |           | n (%) or Mean ± SD | HR (95% CI), p-value     |
| Group (Sleep length)                                                                                                                                                                                                                   | 0 (7h)    | 92025 (37.7%)      |                          |
|                                                                                                                                                                                                                                        | 1 (≤5)    | 15232 (6.2%)       | 1.17 (1.03-1.32, p=.014) |
|                                                                                                                                                                                                                                        | 2 (6h)    | 44842 (18.4%)      | 1.08 (0.99-1.17, p=.077) |
|                                                                                                                                                                                                                                        | 3 (8h)    | 73476 (30.1%)      | 1.07 (1.00-1.15, p=.045) |
|                                                                                                                                                                                                                                        | 4(≥9h)    | 18600 (7.6%)       | 1.17 (1.05-1.31, p=.004) |
| Age                                                                                                                                                                                                                                    | Mean ± SD | 56.7 ± 8.0         | 0.85 (0.85-0.86, p<.001) |
| Townsend                                                                                                                                                                                                                               | Mean ± SD | -1.4 ± 3.0         | 1.01 (1.00-1.02, p=.011) |
| Ethnic                                                                                                                                                                                                                                 | Mean ± SD | 1.1 ± 0.5          | 1.08 (1.03-1.13, p=.001) |
| Education                                                                                                                                                                                                                              | Mean ± SD | 0.4 ± 0.5          | 0.88 (0.83-0.93, p<.001) |
| Smoking_status                                                                                                                                                                                                                         | Mean ± SD | 0.5 ± 0.7          | 0.96 (0.92-1.00, p=.056) |
| Drinking_status                                                                                                                                                                                                                        | Mean ± SD | 1.9 ± 0.5          | 0.99 (0.93-1.04, p=.613) |
| BMI                                                                                                                                                                                                                                    | Mean ± SD | 26.9 ± 5.0         | 1.03 (1.03-1.04, p<.001) |
| Note: n=244175, events=4981, Likelihood ratio test=7089.95 on 11 df(p<.001). BMI, Body Mass Index.                                                                                                                                     |           |                    |                          |

| <b>Supplementary Table S13.2.</b> The Association Between Sleep Duration and the Risk of Reproductive Endocrine Diseases: Model 2 (Further Adjusted for Comorbidities) Based on Imputed Data Analysis |           |                    |                          |
|-------------------------------------------------------------------------------------------------------------------------------------------------------------------------------------------------------|-----------|--------------------|--------------------------|
| Variable                                                                                                                                                                                              |           | n (%) or Mean ± SD | HR (95% CI), p-value     |
| Group (Sleep length)                                                                                                                                                                                  | 0 (7h)    | 92025 (37.7%)      |                          |
|                                                                                                                                                                                                       | 1 (≤5)    | 15232 (6.2%)       | 1.15 (1.02-1.31, p=.024) |
|                                                                                                                                                                                                       | 2 (6h)    | 44842 (18.4%)      | 1.07 (0.99-1.16, p=.097) |
|                                                                                                                                                                                                       | 3 (8h)    | 73476 (30.1%)      | 1.07 (1.00-1.15, p=.045) |
|                                                                                                                                                                                                       | 4(≥9h)    | 18600 (7.6%)       | 1.16 (1.04-1.29, p=.007) |
| Age                                                                                                                                                                                                   | Mean ± SD | 56.7 ± 8.0         | 0.85 (0.85-0.86, p<.001) |
| Townsend                                                                                                                                                                                              | Mean ± SD | -1.4 ± 3.0         | 1.01 (1.00-1.02, p=.028) |
| Ethnic                                                                                                                                                                                                | Mean ± SD | 1.1 ± 0.5          | 1.08 (1.03-1.13, p=.001) |
| Education                                                                                                                                                                                             | Mean ± SD | 0.4 ± 0.5          | 0.87 (0.82-0.92, p<.001) |

|                                                                                                   |           |            |                          |
|---------------------------------------------------------------------------------------------------|-----------|------------|--------------------------|
| Smoking_status                                                                                    | Mean ± SD | 0.5 ± 0.7  | 0.96 (0.92-1.00, p=.042) |
| Drinking_status                                                                                   | Mean ± SD | 1.9 ± 0.5  | 0.98 (0.93-1.04, p=.593) |
| BMI                                                                                               | Mean ± SD | 26.9 ± 5.0 | 1.03 (1.03-1.04, p<.001) |
| diabetes                                                                                          | Mean ± SD | 0.0 ± 0.1  | 1.12 (0.93-1.36, p=.241) |
| hypertension                                                                                      | Mean ± SD | 0.2 ± 0.4  | 1.14 (1.05-1.23, p=.001) |
| family_depression                                                                                 | Mean ± SD | 0.1 ± 0.4  | 1.15 (1.07-1.24, p<.001) |
| Note: n=244175, events=4981, Likelihood ratio test=7121.06 on 14 df(p<.001). BMI, Body Mass Index |           |            |                          |

| <b>Supplementary Table S14.1.</b> The Association Between Sleep Score and the Risk of Reproductive Endocrine Diseases: Model 1 (Adjusted for Age, Socioeconomic Factors, Lifestyle Factors, and BMI) Based on Imputed Data Analysis |                |                    |                          |
|-------------------------------------------------------------------------------------------------------------------------------------------------------------------------------------------------------------------------------------|----------------|--------------------|--------------------------|
| Variable                                                                                                                                                                                                                            |                | n (%) or Mean ± SD | HR (95% CI), p-value     |
| Group (Sleep score)                                                                                                                                                                                                                 | 0 ( $\leq 2$ ) | 80757 (39.4%)      |                          |
|                                                                                                                                                                                                                                     | 1 (3)          | 79530 (38.8%)      | 1.11 (1.03-1.19, p=.004) |
|                                                                                                                                                                                                                                     | 2 ( $\geq 4$ ) | 44677 (21.8%)      | 1.15 (1.06-1.25, p=.001) |
| Age                                                                                                                                                                                                                                 | Mean ± SD      | 56.6 ± 8.0         | 0.85 (0.85-0.86, p<.001) |
| Townsend                                                                                                                                                                                                                            | Mean ± SD      | -1.5 ± 3.0         | 1.01 (1.00-1.02, p=.107) |
| Ethnic                                                                                                                                                                                                                              | Mean ± SD      | 1.1 ± 0.5          | 1.06 (1.01-1.12, p=.023) |
| Education                                                                                                                                                                                                                           | Mean ± SD      | 0.4 ± 0.5          | 0.88 (0.82-0.93, p<.001) |
| Smoking_status                                                                                                                                                                                                                      | Mean ± SD      | 0.5 ± 0.6          | 0.96 (0.92-1.01, p=.088) |
| Drinking_status                                                                                                                                                                                                                     | Mean ± SD      | 1.9 ± 0.5          | 0.96 (0.90-1.03, p=.229) |
| BMI                                                                                                                                                                                                                                 | Mean ± SD      | 26.9 ± 5.0         | 1.03 (1.03-1.04, p<.001) |
| Note: n=204964, events=4174, Likelihood ratio test=5880.63 on 9 df(p<.001). BMI, Body Mass Index.                                                                                                                                   |                |                    |                          |

| <b>Supplementary Table S14.2.</b> The Association Between Sleep Score and the Risk of Reproductive Endocrine Diseases: Model 2 (Further Adjusted for Comorbidities) Based on Imputed Data Analysis |                |                    |                          |
|----------------------------------------------------------------------------------------------------------------------------------------------------------------------------------------------------|----------------|--------------------|--------------------------|
| Variable                                                                                                                                                                                           |                | n (%) or Mean ± SD | HR (95% CI), p-value     |
| Group (Sleep score)                                                                                                                                                                                | 0 ( $\leq 2$ ) | 80757 (39.4%)      |                          |
|                                                                                                                                                                                                    | 1 (3)          | 79530 (38.8%)      | 1.10 (1.03-1.18, p=.007) |

|                                                                                                   |                |                |                          |
|---------------------------------------------------------------------------------------------------|----------------|----------------|--------------------------|
|                                                                                                   | 2 ( $\geq 4$ ) | 44677 (21.8%)  | 1.13 (1.04-1.23, p=.003) |
| Age                                                                                               | Mean $\pm$ SD  | 56.6 $\pm$ 8.0 | 0.85 (0.85-0.86, p<.001) |
| Townsend                                                                                          | Mean $\pm$ SD  | -1.5 $\pm$ 3.0 | 1.01 (1.00-1.02, p=.208) |
| Ethnic                                                                                            | Mean $\pm$ SD  | 1.1 $\pm$ 0.5  | 1.07 (1.01-1.12, p=.017) |
| Education                                                                                         | Mean $\pm$ SD  | 0.4 $\pm$ 0.5  | 0.86 (0.81-0.92, p<.001) |
| Smoking_status                                                                                    | Mean $\pm$ SD  | 0.5 $\pm$ 0.6  | 0.96 (0.92-1.00, p=.070) |
| Drinking_status                                                                                   | Mean $\pm$ SD  | 1.9 $\pm$ 0.5  | 0.96 (0.90-1.02, p=.222) |
| BMI                                                                                               | Mean $\pm$ SD  | 26.9 $\pm$ 5.0 | 1.03 (1.02-1.04, p<.001) |
| diabetes                                                                                          | Mean $\pm$ SD  | 0.0 $\pm$ 0.1  | 1.12 (0.90-1.38, p=.317) |
| hypertension                                                                                      | Mean $\pm$ SD  | 0.2 $\pm$ 0.4  | 1.12 (1.03-1.23, p=.007) |
| family_depression                                                                                 | Mean $\pm$ SD  | 0.1 $\pm$ 0.4  | 1.18 (1.09-1.27, p<.001) |
| Note: n=204964, events=4174, Likelihood ratio test=5908.43 on 12 df(p<.001). BMI, Body Mass Index |                |                |                          |

| <b>Supplementary Table S15.1.</b> The Association Between Sleep Duration and the Risk of Reproductive Endocrine Diseases: Model 1 (Adjusted for Age, Socioeconomic Factors, Lifestyle Factors, and BMI) Based on Complete Data Analysis |                 |                        |                          |
|-----------------------------------------------------------------------------------------------------------------------------------------------------------------------------------------------------------------------------------------|-----------------|------------------------|--------------------------|
| Variable                                                                                                                                                                                                                                |                 | n (%) or Mean $\pm$ SD | HR (95% CI), p-value     |
| Group (Sleep length)                                                                                                                                                                                                                    | 0 (7h)          | 76626 (39.6%)          |                          |
|                                                                                                                                                                                                                                         | 1 ( $\leq 5$ )  | 9889 (5.1%)            | 1.23 (1.07-1.41, p=.004) |
|                                                                                                                                                                                                                                         | 2 (6h)          | 34666 (17.9%)          | 1.08 (0.99-1.18, p=.073) |
|                                                                                                                                                                                                                                         | 3 (8h)          | 58828 (30.4%)          | 1.06 (0.99-1.14, p=.100) |
|                                                                                                                                                                                                                                         | 4 ( $\geq 9$ h) | 13405 (6.9%)           | 1.14 (1.01-1.29, p=.028) |
| Age                                                                                                                                                                                                                                     | Mean $\pm$ SD   | 55.7 $\pm$ 7.9         | 0.85 (0.85-0.86, p<.001) |
| Townsend                                                                                                                                                                                                                                | Mean $\pm$ SD   | -1.6 $\pm$ 2.9         | 1.01 (1.00-1.02, p=.005) |
| Ethnic                                                                                                                                                                                                                                  | Mean $\pm$ SD   | 1.1 $\pm$ 0.5          | 1.09 (1.04-1.15, p=.001) |
| Education                                                                                                                                                                                                                               | Mean $\pm$ SD   | 0.4 $\pm$ 0.5          | 0.86 (0.81-0.92, p<.001) |
| Smoking_status                                                                                                                                                                                                                          | Mean $\pm$ SD   | 0.5 $\pm$ 0.6          | 0.95 (0.90-0.99, p=.018) |
| Drinking_status                                                                                                                                                                                                                         | Mean $\pm$ SD   | 1.9 $\pm$ 0.5          | 0.99 (0.93-1.06, p=.743) |
| BMI                                                                                                                                                                                                                                     | Mean $\pm$ SD   | 26.6 $\pm$ 5.0         | 1.03 (1.03-1.04, p<.001) |
| Note: n=193414, events=4380, Likelihood ratio test=5803.41 on 11 df(p<.001). BMI, Body Mass Index.                                                                                                                                      |                 |                        |                          |

| <b>Supplementary Table S15.2.</b> The Association Between Sleep Duration and the Risk of Reproductive Endocrine Diseases: Model 2 (Further Adjusted for Comorbidities) Based on Complete Data Analysis |           |                    |                          |
|--------------------------------------------------------------------------------------------------------------------------------------------------------------------------------------------------------|-----------|--------------------|--------------------------|
| Variable                                                                                                                                                                                               |           | n (%) or Mean ± SD | HR (95% CI), p-value     |
| Group (Sleep length)                                                                                                                                                                                   | 0 (7h)    | 76626 (39.6%)      |                          |
|                                                                                                                                                                                                        | 1 (≤5)    | 9889 (5.1%)        | 1.21 (1.06-1.39, p=.006) |
|                                                                                                                                                                                                        | 2 (6h)    | 34666 (17.9%)      | 1.08 (0.99-1.18, p=.086) |
|                                                                                                                                                                                                        | 3 (8h)    | 58828 (30.4%)      | 1.06 (0.99-1.14, p=.097) |
|                                                                                                                                                                                                        | 4(≥9h)    | 13405 (6.9%)       | 1.13 (1.01-1.28, p=.040) |
| Age                                                                                                                                                                                                    | Mean ± SD | 55.7 ± 7.9         | 0.85 (0.85-0.86, p<.001) |
| Townsend                                                                                                                                                                                               | Mean ± SD | -1.6 ± 2.9         | 1.01 (1.00-1.02, p=.009) |
| Ethnic                                                                                                                                                                                                 | Mean ± SD | 1.1 ± 0.5          | 1.09 (1.04-1.15, p=.001) |
| Education                                                                                                                                                                                              | Mean ± SD | 0.4 ± 0.5          | 0.86 (0.81-0.92, p<.001) |
| Smoking_status                                                                                                                                                                                         | Mean ± SD | 0.5 ± 0.6          | 0.94 (0.90-0.99, p=.014) |
| Drinking_status                                                                                                                                                                                        | Mean ± SD | 1.9 ± 0.5          | 0.99 (0.93-1.06, p=.741) |
| BMI                                                                                                                                                                                                    | Mean ± SD | 26.6 ± 5.0         | 1.03 (1.03-1.04, p<.001) |
| diabetes                                                                                                                                                                                               | Mean ± SD | 0.0 ± 0.1          | 1.06 (0.85-1.32, p=.633) |
| hypertension                                                                                                                                                                                           | Mean ± SD | 0.2 ± 0.4          | 1.15 (1.05-1.25, p=.002) |
| family_depression                                                                                                                                                                                      | Mean ± SD | 0.2 ± 0.4          | 1.14 (1.06-1.23, p=.001) |
| Note: n=193414, events=4380, Likelihood ratio test=5824.59 on 14 df(p<.001). BMI, Body Mass Index                                                                                                      |           |                    |                          |

| <b>Supplementary Table S16.1.</b> The Association Between Sleep Score and the Risk of Reproductive Endocrine Diseases: Model 1 (Adjusted for Age, Socioeconomic Factors, Lifestyle Factors, and BMI) Based on Complete Data Analysis |           |                    |                          |
|--------------------------------------------------------------------------------------------------------------------------------------------------------------------------------------------------------------------------------------|-----------|--------------------|--------------------------|
| Variable                                                                                                                                                                                                                             |           | n (%) or Mean ± SD | HR (95% CI), p-value     |
| Group (Sleep score)                                                                                                                                                                                                                  | 0 (≤2)    | 67187 (41.1%)      |                          |
|                                                                                                                                                                                                                                      | 1 (3)     | 62802 (38.4%)      | 1.09 (1.01-1.17, p=.023) |
|                                                                                                                                                                                                                                      | 2 (≥4)    | 33460 (20.5%)      | 1.17 (1.07-1.27, p=.001) |
| Age                                                                                                                                                                                                                                  | Mean ± SD | 55.6 ± 7.9         | 0.85 (0.85-0.86, p<.001) |
| Townsend                                                                                                                                                                                                                             | Mean ± SD | -1.7 ± 2.9         | 1.01 (1.00-1.02, p=.052) |
| Ethnic                                                                                                                                                                                                                               | Mean ± SD | 1.1 ± 0.5          | 1.07 (1.02-1.14, p=.012) |
| Education                                                                                                                                                                                                                            | Mean ± SD | 0.4 ± 0.5          | 0.86 (0.80-0.92, p<.001) |

|                                                                                                   |           |            |                          |
|---------------------------------------------------------------------------------------------------|-----------|------------|--------------------------|
| Smoking_status                                                                                    | Mean ± SD | 0.5 ± 0.6  | 0.95 (0.90-0.99, p=.030) |
| Drinking_status                                                                                   | Mean ± SD | 1.9 ± 0.4  | 0.98 (0.91-1.05, p=.534) |
| BMI                                                                                               | Mean ± SD | 26.6 ± 4.9 | 1.03 (1.03-1.04, p<.001) |
| Note: n=163449, events=3700, Likelihood ratio test=4827.35 on 9 df(p<.001). BMI, Body Mass Index. |           |            |                          |

| <b>Supplementary Table S16.2.</b> The Association Between Sleep Score and the Risk of Reproductive Endocrine Diseases: Model 2 (Further Adjusted for Comorbidities) Based on Complete Data Analysis |           |                    |                          |
|-----------------------------------------------------------------------------------------------------------------------------------------------------------------------------------------------------|-----------|--------------------|--------------------------|
| Variable                                                                                                                                                                                            |           | n (%) or Mean ± SD | HR (95% CI), p-value     |
| Group (Sleep score)                                                                                                                                                                                 | 0 (≤2)    | 67187 (41.1%)      |                          |
|                                                                                                                                                                                                     | 1 (3)     | 62802 (38.4%)      | 1.08 (1.01-1.17, p=.033) |
|                                                                                                                                                                                                     | 2 (≥4)    | 33460 (20.5%)      | 1.15 (1.05-1.26, p=.002) |
| Age                                                                                                                                                                                                 | Mean ± SD | 55.6 ± 7.9         | 0.85 (0.85-0.86, p<.001) |
| Townsend                                                                                                                                                                                            | Mean ± SD | -1.7 ± 2.9         | 1.01 (1.00-1.02, p=.077) |
| Ethnic                                                                                                                                                                                              | Mean ± SD | 1.1 ± 0.5          | 1.07 (1.02-1.14, p=.012) |
| Education                                                                                                                                                                                           | Mean ± SD | 0.4 ± 0.5          | 0.86 (0.80-0.92, p<.001) |
| Smoking_status                                                                                                                                                                                      | Mean ± SD | 0.5 ± 0.6          | 0.94 (0.90-0.99, p=.024) |
| Drinking_status                                                                                                                                                                                     | Mean ± SD | 1.9 ± 0.4          | 0.98 (0.91-1.05, p=.536) |
| BMI                                                                                                                                                                                                 | Mean ± SD | 26.6 ± 4.9         | 1.03 (1.02-1.04, p<.001) |
| diabetes                                                                                                                                                                                            | Mean ± SD | 0.0 ± 0.1          | 1.03 (0.80-1.31, p=.829) |
| hypertension                                                                                                                                                                                        | Mean ± SD | 0.2 ± 0.4          | 1.14 (1.04-1.26, p=.005) |
| family_depression                                                                                                                                                                                   | Mean ± SD | 0.2 ± 0.4          | 1.17 (1.08-1.27, p<.001) |
| Note: n=163449, events=3700, Likelihood ratio test=4848.66 on 12 df(p<.001). BMI, Body Mass Index.                                                                                                  |           |                    |                          |

| <b>Supplementary Table S17.1.</b> The Association Between Type of Shift Work and the Risk of Reproductive Endocrine Diseases: Model 1 (Adjusted for Age, Socioeconomic Factors, Lifestyle Factors, and BMI) Based on Imputed Data Analysis |                   |                    |                          |
|--------------------------------------------------------------------------------------------------------------------------------------------------------------------------------------------------------------------------------------------|-------------------|--------------------|--------------------------|
| Variable                                                                                                                                                                                                                                   |                   | n (%) or Mean ± SD | HR (95% CI), p-value     |
| Type of Shift Work                                                                                                                                                                                                                         | 0 (No shift work) | 111816 (85.5%)     |                          |
|                                                                                                                                                                                                                                            | 1 (Day shift)     | 10928 (8.4%)       | 1.10 (0.98-1.23, p=.096) |
|                                                                                                                                                                                                                                            | 2 (Mixed shift)   | 4577 (3.5%)        | 1.06 (0.91-1.24, p=.445) |

|                                                                                                    |                            |             |                          |
|----------------------------------------------------------------------------------------------------|----------------------------|-------------|--------------------------|
|                                                                                                    | 3 (Night shift)            | 1486 (1.1%) | 1.39 (1.11-1.75, p=.005) |
|                                                                                                    | 4 (Permanent night shift.) | 2038 (1.6%) | 1.21 (0.98-1.51, p=.082) |
| Age                                                                                                | Mean ± SD                  | 52.6 ± 6.9  | 0.85 (0.84-0.85, p<.001) |
| Townsend                                                                                           | Mean ± SD                  | -1.3 ± 3.0  | 1.01 (1.00-1.02, p=.223) |
| Ethnic                                                                                             | Mean ± SD                  | 1.1 ± 0.5   | 1.08 (1.02-1.14, p=.009) |
| Education                                                                                          | Mean ± SD                  | 0.4 ± 0.5   | 0.89 (0.83-0.95, p<.001) |
| Smoking_status                                                                                     | Mean ± SD                  | 0.5 ± 0.7   | 0.94 (0.89-0.99, p=.010) |
| Drinking_status                                                                                    | Mean ± SD                  | 1.9 ± 0.4   | 0.99 (0.92-1.07, p=.820) |
| BMI                                                                                                | Mean ± SD                  | 26.6 ± 5.0  | 1.03 (1.03-1.04, p<.001) |
| Note: n=130845, events=3858, Likelihood ratio test=3910.68 on 11 df(p<.001). BMI, Body Mass Index. |                            |             |                          |

| <b>Supplementary Table S17.2.</b> The Association Between Type of Shift Work and the Risk of Reproductive Endocrine Diseases: Model 2 (Further Adjusted for Comorbidities) Based on Imputed Data Analysis |                            |                    |                          |
|-----------------------------------------------------------------------------------------------------------------------------------------------------------------------------------------------------------|----------------------------|--------------------|--------------------------|
| Variable                                                                                                                                                                                                  |                            | n (%) or Mean ± SD | HR (95% CI), p-value     |
| Type of Shift Work                                                                                                                                                                                        | 0 (No shift work)          | 111816 (85.5%)     |                          |
|                                                                                                                                                                                                           | 1 (Day shift)              | 10928 (8.4%)       | 1.09 (0.98-1.22, p=.109) |
|                                                                                                                                                                                                           | 2 (Mixed shift)            | 4577 (3.5%)        | 1.06 (0.91-1.24, p=.430) |
|                                                                                                                                                                                                           | 3 (Night shift)            | 1486 (1.1%)        | 1.40 (1.11-1.76, p=.004) |
|                                                                                                                                                                                                           | 4 (Permanent night shift.) | 2038 (1.6%)        | 1.22 (0.98-1.51, p=.076) |
| Age                                                                                                                                                                                                       | Mean ± SD                  | 52.6 ± 6.9         | 0.85 (0.84-0.85, p<.001) |
| Townsend                                                                                                                                                                                                  | Mean ± SD                  | -1.3 ± 3.0         | 1.00 (0.99-1.02, p=.380) |
| Ethnic                                                                                                                                                                                                    | Mean ± SD                  | 1.1 ± 0.5          | 1.08 (1.02-1.14, p=.006) |
| Education                                                                                                                                                                                                 | Mean ± SD                  | 0.4 ± 0.5          | 0.89 (0.83-0.95, p<.001) |
| Smoking_status                                                                                                                                                                                            | Mean ± SD                  | 0.5 ± 0.7          | 0.94 (0.90-0.99, p=.011) |
| Drinking_status                                                                                                                                                                                           | Mean ± SD                  | 1.9 ± 0.4          | 0.99 (0.92-1.07, p=.817) |
| BMI                                                                                                                                                                                                       | Mean ± SD                  | 26.6 ± 5.0         | 1.03 (1.02-1.04, p<.001) |
| diabetes                                                                                                                                                                                                  | Mean ± SD                  | 0.0 ± 0.1          | 1.21 (0.95-1.54, p=.119) |
| hypertension                                                                                                                                                                                              | Mean ± SD                  | 0.2 ± 0.4          | 1.14 (1.04-1.25, p=.005) |
| family_depression                                                                                                                                                                                         | Mean ± SD                  | 0.2 ± 0.4          | 1.13 (1.04-1.23, p=.004) |
| Note: n=130845, events=3858, Likelihood ratio test=3930.94 on 14 df(p<.001). BMI, Body Mass Index.                                                                                                        |                            |                    |                          |

| <b>Supplementary Table S18.1.</b> The Association Between Type of Shift Work and the Risk of Reproductive Endocrine Diseases: Model 1 (Adjusted for Age, Socioeconomic Factors, Lifestyle Factors, and BMI) Based on Complete Data Analysis |                            |                    |                          |
|---------------------------------------------------------------------------------------------------------------------------------------------------------------------------------------------------------------------------------------------|----------------------------|--------------------|--------------------------|
| Variable                                                                                                                                                                                                                                    |                            | n (%) or Mean ± SD | HR (95% CI), p-value     |
| Type of Shift Work                                                                                                                                                                                                                          | 0 (No shift work)          | 98502 (85.8%)      |                          |
|                                                                                                                                                                                                                                             | 1 (Day shift)              | 9254 (8.1%)        | 1.12 (1.00-1.26, p=.054) |
|                                                                                                                                                                                                                                             | 2 (Mixed shift)            | 4072 (3.5%)        | 1.10 (0.94-1.28, p=.255) |
|                                                                                                                                                                                                                                             | 3 (Night shift)            | 1302 (1.1%)        | 1.42 (1.12-1.80, p=.004) |
|                                                                                                                                                                                                                                             | 4 (Permanent night shift.) | 1724 (1.5%)        | 1.32 (1.06-1.65, p=.014) |
| Age                                                                                                                                                                                                                                         | Mean ± SD                  | 52.2 ± 6.8         | 0.85 (0.84-0.85, p<.001) |
| Townsend                                                                                                                                                                                                                                    | Mean ± SD                  | -1.4 ± 2.9         | 1.01 (1.00-1.02, p=.114) |
| Ethnic                                                                                                                                                                                                                                      | Mean ± SD                  | 1.1 ± 0.5          | 1.08 (1.02-1.15, p=.007) |
| Education                                                                                                                                                                                                                                   | Mean ± SD                  | 0.4 ± 0.5          | 0.89 (0.83-0.95, p=.001) |
| Smoking_status                                                                                                                                                                                                                              | Mean ± SD                  | 0.5 ± 0.6          | 0.93 (0.88-0.97, p=.003) |
| Drinking_status                                                                                                                                                                                                                             | Mean ± SD                  | 1.9 ± 0.4          | 0.99 (0.92-1.07, p=.790) |
| BMI                                                                                                                                                                                                                                         | Mean ± SD                  | 26.5 ± 5.0         | 1.03 (1.03-1.04, p<.001) |
| Note: n=114854, events=3536, Likelihood ratio test=3394.72 on 11 df(p<.001). BMI, Body Mass Index.                                                                                                                                          |                            |                    |                          |

| <b>Supplementary Table S18.2.</b> The Association Between Type of Shift Work and the Risk of Reproductive Endocrine Diseases: Model 2 (Further Adjusted for Comorbidities) Based on Complete Data Analysis |                            |                    |                          |
|------------------------------------------------------------------------------------------------------------------------------------------------------------------------------------------------------------|----------------------------|--------------------|--------------------------|
| Variable                                                                                                                                                                                                   |                            | n (%) or Mean ± SD | HR (95% CI), p-value     |
| Type of Shift Work                                                                                                                                                                                         | 0 (No shift work)          | 98502 (85.8%)      |                          |
|                                                                                                                                                                                                            | 1 (Day shift)              | 9254 (8.1%)        | 1.12 (1.00-1.25, p=.060) |
|                                                                                                                                                                                                            | 2 (Mixed shift)            | 4072 (3.5%)        | 1.10 (0.94-1.29, p=.239) |
|                                                                                                                                                                                                            | 3 (Night shift)            | 1302 (1.1%)        | 1.43 (1.12-1.81, p=.004) |
|                                                                                                                                                                                                            | 4 (Permanent night shift.) | 1724 (1.5%)        | 1.33 (1.06-1.66, p=.012) |
| Age                                                                                                                                                                                                        | Mean ± SD                  | 52.2 ± 6.8         | 0.85 (0.84-0.85, p<.001) |
| Townsend                                                                                                                                                                                                   | Mean ± SD                  | -1.4 ± 2.9         | 1.01 (1.00-1.02, p=.146) |
| Ethnic                                                                                                                                                                                                     | Mean ± SD                  | 1.1 ± 0.5          | 1.08 (1.02-1.15, p=.008) |
| Education                                                                                                                                                                                                  | Mean ± SD                  | 0.4 ± 0.5          | 0.89 (0.83-0.95, p=.001) |
| Smoking_status                                                                                                                                                                                             | Mean ± SD                  | 0.5 ± 0.6          | 0.92 (0.88-0.97, p=.003) |

|                                                                                                    |           |            |                          |
|----------------------------------------------------------------------------------------------------|-----------|------------|--------------------------|
| Drinking_status                                                                                    | Mean ± SD | 1.9 ± 0.4  | 0.99 (0.91-1.07, p=.783) |
| BMI                                                                                                | Mean ± SD | 26.5 ± 5.0 | 1.03 (1.02-1.04, p<.001) |
| diabetes                                                                                           | Mean ± SD | 0.0 ± 0.1  | 1.13 (0.87-1.47, p=.344) |
| hypertension                                                                                       | Mean ± SD | 0.2 ± 0.4  | 1.17 (1.06-1.28, p=.002) |
| family_depression                                                                                  | Mean ± SD | 0.2 ± 0.4  | 1.12 (1.02-1.22, p=.012) |
| Note: n=114854, events=3536, Likelihood ratio test=3411.39 on 14 df(p<.001). BMI, Body Mass Index. |           |            |                          |

| <b>Supplementary Table S19.1.</b> Joint association of sleep duration and shift work with reproductive endocrine disorders (reference: 7 h & No shift work) — Main Effects Model |                  |                       |           |         |              |                 |
|----------------------------------------------------------------------------------------------------------------------------------------------------------------------------------|------------------|-----------------------|-----------|---------|--------------|-----------------|
| Variable                                                                                                                                                                         | Coef ( $\beta$ ) | Exp(Coefficient) (HR) | SE (Coef) | z       | p-value      | 95% CI (HR)     |
| sleep length 7h                                                                                                                                                                  | Reference        |                       |           |         |              |                 |
| sleep length $\leq 5$ h                                                                                                                                                          | 0.22693          | 1.2547                | 0.088683  | 2.559   | 0.010501 *   | 1.0546 - 1.4929 |
| sleep length 6 h                                                                                                                                                                 | 0.082815         | 1.0863                | 0.051879  | 1.596   | 0.110417     | 0.9813 - 1.2026 |
| sleep length 8 h                                                                                                                                                                 | 0.031674         | 1.0322                | 0.042083  | 0.753   | 0.451646     | 0.9505 - 1.1209 |
| sleep length $\geq 9$ h                                                                                                                                                          | 0.132427         | 1.1416                | 0.077619  | 1.706   | 0.087984 .   | 0.9805 - 1.3292 |
| Type of shift work: no shift work                                                                                                                                                | Reference        |                       |           |         |              |                 |
| Type of shift work: Day shift                                                                                                                                                    | 0.151188         | 1.1632                | 0.087869  | 1.721   | 0.085324 .   | 0.9792 - 1.3818 |
| Type of shift work: Mixed shift                                                                                                                                                  | 0.129109         | 1.1378                | 0.124642  | 1.036   | 0.300278     | 0.8912 - 1.4527 |
| Type of shift work: Night shift                                                                                                                                                  | 0.446219         | 1.5624                | 0.194666  | 2.292   | 0.021893 *   | 1.0668 - 2.2882 |
| Type of shift work: Permanent night                                                                                                                                              | 0.051521         | 1.0529                | 0.215315  | 0.239   | 0.810887     | 0.6904 - 1.6057 |
| Age                                                                                                                                                                              | -0.166615        | 0.8465                | 0.003112  | -53.537 | < 2e-16 ***  | 0.8414 - 0.8517 |
| Townsend                                                                                                                                                                         | 0.00528          | 1.0053                | 0.00541   | 0.976   | 0.329116     | 0.9947 - 1.0160 |
| Ethnic                                                                                                                                                                           | 0.072334         | 1.075                 | 0.028092  | 2.575   | 0.010026 *   | 1.0174 - 1.1359 |
| Education                                                                                                                                                                        | -0.121217        | 0.8858                | 0.033456  | -3.623  | 0.000291 *** | 0.8296 - 0.9459 |
| Smoking_status                                                                                                                                                                   | -0.062575        | 0.9393                | 0.02468   | -2.535  | 0.011231 *   | 0.8950 - 0.9859 |
| Drinking_status                                                                                                                                                                  | -0.006902        | 0.9931                | 0.037697  | -0.183  | 0.854723     | 0.9224 - 1.0693 |
| BMI                                                                                                                                                                              | 0.03104          | 1.0315                | 0.002862  | 10.847  | < 2e-16 ***  | 1.0258 - 1.0373 |
| $\leq 5$ h $\times$ Day shift                                                                                                                                                    | -0.322046        | 0.7247                | 0.259435  | -1.241  | 0.214481     | 0.4358 - 1.2049 |
| 6 h $\times$ Day shift                                                                                                                                                           | -0.055961        | 0.9456                | 0.151918  | -0.368  | 0.712602     | 0.7021 - 1.2735 |
| 7h $\times$ Day shift                                                                                                                                                            | Reference        |                       |           |         |              |                 |
| 8 h $\times$ Day shift                                                                                                                                                           | -0.055452        | 0.9461                | 0.137002  | -0.405  | 0.68566      | 0.7233 - 1.2375 |
| $\geq 9$ h $\times$ Day shift                                                                                                                                                    | -0.289692        | 0.7485                | 0.241588  | -1.199  | 0.230481     | 0.4662 - 1.2018 |

|                                                                                                                                                                                                                                                                                                                 |           |        |          |        |            |                 |
|-----------------------------------------------------------------------------------------------------------------------------------------------------------------------------------------------------------------------------------------------------------------------------------------------------------------|-----------|--------|----------|--------|------------|-----------------|
| ≤5 h × Mixed shift                                                                                                                                                                                                                                                                                              | -0.467412 | 0.6266 | 0.336811 | -1.388 | 0.165211   | 0.3238 - 1.2126 |
| 6 h × Mixed shift                                                                                                                                                                                                                                                                                               | -0.148871 | 0.8617 | 0.212506 | -0.701 | 0.483586   | 0.5681 - 1.3069 |
| 7 h × Mixed shift                                                                                                                                                                                                                                                                                               | 0.028723  | 0.9544 | 0.231141 | 0.173  | 0.812213   | 0.8711-1.2318   |
| 8 h × Mixed shift                                                                                                                                                                                                                                                                                               | 0.051682  | 1.053  | 0.188982 | 0.273  | 0.784486   | 0.7271 - 1.5251 |
| ≥9 h × Mixed shift                                                                                                                                                                                                                                                                                              | -0.512289 | 0.5991 | 0.381727 | -1.342 | 0.179587   | 0.2835 - 1.2660 |
| ≤5 h × Night shift                                                                                                                                                                                                                                                                                              | 0.334452  | 1.7157 | 0.163233 | 2.772  | 0.004119** | 1.3062 - 2.1731 |
| 6 h × Night shift                                                                                                                                                                                                                                                                                               | 0.221545  | 1.356  | 0.143485 | 1.264  | 0.026208*  | 1.1341 - 1.9261 |
| 7 h × Night shift                                                                                                                                                                                                                                                                                               | 0.145781  | 1.1452 | 0.156612 | 0.344  | 0.058182   | 0.9133-1.5119   |
| 8 h × Night shift                                                                                                                                                                                                                                                                                               | 0.064811  | 1.067  | 0.290297 | 0.223  | 0.823336   | 0.6040 - 1.8847 |
| ≥9 h × Night shift                                                                                                                                                                                                                                                                                              | 0.34727   | 0.7066 | 0.493041 | -0.704 | 0.481219   | 0.2688 - 1.8572 |
| ≤5 h × Permanent night                                                                                                                                                                                                                                                                                          | 0.223857  | 1.2509 | 0.169692 | 1.606  | 0.004832*  | 1.1161 - 2.5817 |
| 6 h × Permanent night                                                                                                                                                                                                                                                                                           | 0.187676  | 1.1476 | 0.306    | 1.245  | 0.052767.  | 0.9630 - 2.0905 |
| 7 h × Permanent night                                                                                                                                                                                                                                                                                           | 0.201845  | 1.1205 | 0.221924 | 0.913  | 0.561133   | 0.8408 - 1.2115 |
| 8 h × Permanent night                                                                                                                                                                                                                                                                                           | 0.100908  | 1.1062 | 0.316018 | 0.319  | 0.74949    | 0.5954 - 2.0550 |
| ≥9 h × Permanent night                                                                                                                                                                                                                                                                                          | 0.280153  | 1.3233 | 0.403309 | 0.695  | 0.487284   | 0.6003 - 2.9172 |
| <b>Note:</b> Data are hazard ratios (HRs) from Cox models with an interaction term, adjusted for age, Townsend deprivation index, ethnicity, education level, smoking status, drinking status, BMI.                                                                                                             |           |        |          |        |            |                 |
| Bold indicates p < 0.05. REDs: reproductive endocrine disorders. Reference: 7 h sleep × No shift work. Coef (β), Coefficient (Beta). Exp(Coefficient) (HR), Exponentiated Coefficient (Hazard Ratio). SE (Coef), Standard Error (Coefficient). z, z-value. 95% CI (HR), 95% Confidence Interval (Hazard Ratio). |           |        |          |        |            |                 |

| <b>Supplementary Table S19.2. Joint association of sleep duration and shift work with reproductive endocrine disorders (reference: 7 h &amp; No shift work) — Model Adjusted for Comorbidities</b> |                 |                              |                  |          |                   |                    |
|----------------------------------------------------------------------------------------------------------------------------------------------------------------------------------------------------|-----------------|------------------------------|------------------|----------|-------------------|--------------------|
| <b>Variable</b>                                                                                                                                                                                    | <b>Coef (β)</b> | <b>Exp(Coefficient) (HR)</b> | <b>SE (Coef)</b> | <b>z</b> | <b>p-value</b>    | <b>95% CI (HR)</b> |
| sleep length 7h                                                                                                                                                                                    | Reference       |                              |                  |          |                   |                    |
| sleep length ≤5 h                                                                                                                                                                                  | 0.218092        | 1.2437                       | 0.088728         | 2.458    | <b>0.013972 *</b> | 1.0452 - 1.4799    |

|                                     |                  |        |          |         |                       |                 |
|-------------------------------------|------------------|--------|----------|---------|-----------------------|-----------------|
| sleep length 6 h                    | 0.079578         | 1.0828 | 0.051887 | 1.534   | 0.125105              | 0.9781 - 1.1987 |
| sleep length 8 h                    | 0.0321           | 1.0326 | 0.042083 | 0.763   | 0.445588              | 0.9509 - 1.1214 |
| sleep length $\geq$ 9 h             | 0.127369         | 1.1358 | 0.07763  | 1.641   | 0.100858              | 0.9755 - 1.3225 |
| Type of shift work: no shift work   | Reference        |        |          |         |                       |                 |
| Type of shift work: Day shift       | 0.147436         | 1.1589 | 0.087879 | 1.678   | 0.093403              | 0.9755 - 1.3767 |
| Type of shift work: Mixed shift     | 0.12949          | 1.1382 | 0.12464  | 1.039   | 0.298846              | 0.8915 - 1.4532 |
| Type of shift work: Night shift     | 0.453211         | 1.5734 | 0.19468  | 2.328   | <b>0.019913 *</b>     | 1.0743 - 2.3043 |
| Type of shift work: Permanent night | 0.055091         | 1.0566 | 0.215323 | 0.256   | 0.798065              | 0.6929 - 1.6114 |
| Age                                 | -0.16781         | 0.8455 | 0.003144 | -53.377 | <b>&lt; 2e-16 ***</b> | 0.8403 - 0.8507 |
| Townsend                            | 0.004633         | 1.0046 | 0.005412 | 0.856   | 0.391931              | 0.994 - 1.0154  |
| Ethnic                              | 0.0716           | 1.0742 | 0.028115 | 2.547   | 0.010875              | 1.0166 - 1.1351 |
| Education                           | -0.120767        | 0.8862 | 0.033477 | -3.623  | <b>0.000309 ***</b>   | 0.83 - 0.9463   |
| Smoking status                      | -0.063618        | 0.9384 | 0.02468  | -2.535  | <b>0.010013 *</b>     | 0.894 - 0.9849  |
| Drinking_status                     | -0.006893        | 0.9931 | 0.03772  | -0.183  | 0.855003              | 0.9224 - 1.0693 |
| BMI                                 | 0.028815         | 1.0292 | 0.002945 | 9.783   | <b>&lt; 2e-16 ***</b> | 1.0233 - 1.0352 |
| diabetes                            | 0.184002         | 1.202  | 0.122618 | 1.501   | 0.133455              | 0.9452 - 1.5286 |
| hypertension                        | 0.127663         | 1.1362 | 0.047574 | 2.683   | <b>0.007287 **</b>    | 1.035 - 1.2472  |
| Family depression                   | 0.112572         | 1.1192 | 0.043002 | 2.618   | <b>0.00885 **</b>     | 1.0287 - 1.2176 |
| $\leq$ 5 h $\times$ Day shift       | -0.320634        | 0.7257 | 0.25944  | -1.236  | 0.216507              | 0.4364 - 1.2067 |
| 6 h $\times$ Day shift              | -0.052832        | 0.9485 | 0.151923 | -0.348  | 0.728024              | 0.7043 - 1.2775 |
| 7h $\times$ Day shift               | <b>Reference</b> |        |          |         |                       |                 |
| 8 h $\times$ Day shift              | -0.053822        | 0.9476 | 0.137003 | -0.393  | 0.694428              | 0.7244 - 1.2395 |
| $\geq$ 9 h $\times$ Day shift       | -0.28496         | 0.752  | 0.241594 | -1.179  | 0.238201              | 0.4684 - 1.2075 |
| $\leq$ 5 h $\times$ Mixed shift     | -0.459174        | 0.6318 | 0.336815 | -1.363  | 0.172794              | 0.3265 - 1.2226 |
| 6 h $\times$ Mixed shift            | -0.145884        | 0.8643 | 0.21251  | -0.686  | 0.492408              | 0.5698 - 1.3108 |

|                        |           |               |          |        |                   |                        |
|------------------------|-----------|---------------|----------|--------|-------------------|------------------------|
| 7 h × Mixed shift      | 0.028145  | 0.9588        | 0.231566 | 0.183  | 0.840113          | 0.8723 - 1.2411        |
| 8 h × Mixed shift      | 0.053798  | 1.0553        | 0.188985 | 0.273  | 0.775898          | 0.7286 - 1.5284        |
| ≥9 h × Mixed shift     | -0.508013 | 0.6017        | 0.38173  | -1.331 | 0.183249          | 0.2847 - 1.2715        |
| ≤5 h × Night shift     | 0.332692  | 1.7131        | 0.16234  | 2.769  | <b>0.004425**</b> | <b>1.3067 - 2.1762</b> |
| 6 h × Night shift      | 0.226601  | 1.352         | 0.15495  | 1.279  | <b>0.026083*</b>  | 1.1345 - 1.9549        |
| 7 h × Night shift      | 0.148912  | <b>1.1471</b> | 0.143228 | 0.365  | <b>0.059115</b>   | <b>0.91141-1.5105</b>  |
| 8 h × Night shift      | 0.059052  | 1.0608        | 0.290312 | 0.223  | 0.838817          | 0.6005 - 1.874         |
| ≥9 h × Night shift     | -0.350926 | 0.704         | 0.493045 | -0.712 | 0.476619          | 0.2688 - 1.8504        |
| ≤5 h × Permanent night | 0.224839  | 1.2521        | 0.369702 | 0.608  | 0.543081          | 0.6067 - 2.5843        |
| 6 h × Permanent night  | 0.13683   | 1.1466        | 0.306013 | 0.447  | 0.654775          | 0.6294 - 2.0888        |
| 7 h × Permanent night  | 0.184745  | 1.1274        | 0.223773 | 0.944  | 0.567741          | 0.8471 - 1.3013        |
| 8 h × Permanent night  | 0.099433  | 1.1045        | 0.316022 | 0.315  | 0.753037          | 0.5945 - 2.052         |
| ≥9 h × Permanent night | 0.293508  | 1.3411        | 0.40332  | 0.728  | 0.466779          | 0.6084 - 2.9565        |

Data are hazard ratios (HRs) from Cox models with an interaction term, adjusted for age, Townsend deprivation index, ethnicity, education level, smoking status, drinking status, BMI, diabetes, hypertension, and family history of depression.

Bold indicates  $p < 0.05$ . REDs: reproductive endocrine disorders. Reference: 7 h sleep × No shift work.

**Supplementary Table S20.1** Mediation Effects of Inflammatory Biomarkers Linking long Sleep Duration ( $\leq 5$  h) to REDs (Reference: 7 h)

| Mediator    | Average Causal Mediation Effect Estimate | Average Causal Mediation Effect Confidence Interval | Average Causal Mediation Effect P-value | Average Direct Effect Estimate | Average Direct Effect Confidence Interval | Average Direct Effect P-value | Total Effect Estimate | Total Effect Confidence Interval | Total Effect P-value | Proportion Mediated | Proportion Mediated Confidence Interval | Proportion Mediated P-value |
|-------------|------------------------------------------|-----------------------------------------------------|-----------------------------------------|--------------------------------|-------------------------------------------|-------------------------------|-----------------------|----------------------------------|----------------------|---------------------|-----------------------------------------|-----------------------------|
| Neutrophils | 1788.99477                               | 1138.418~2646.064                                   | < 0.001                                 | 13576.82                       | 2690.332~31753.613                        | 0.04                          | 15134.2               | 3294.224~33568.977               | < 0.001              | 11.82%              | 4.60% ~ 37.30%                          | < 0.001                     |
| Monocytes   | 79.582727                                | 4.877~168.833                                       | 0.02                                    | 15320.24                       | 2607.927~29408.191                        | 0.04                          | 15384.21              | 2665.621~29459.637               | 0.04                 | 0.50%               | 0 ~ 1.50%                               | 0.06                        |
| Basophils   | 138.191175                               | 31.764~341.412                                      | 0.02                                    | 14567.78                       | 1766.792~26135.219                        | 0.02                          | 14679.51              | 1948.325~26210.518               | 0.02                 | 0.86%               | 0.10% ~ 6.30%                           | 0.04                        |
| Eosinophils | -6.972294                                | -70.187 ~ 35.589                                    | 0.74                                    | 14869.65                       | 3465.587 ~ 25573.531                      | < 0.001                       | -14874.6              | -25581.256 ~ -3479.764           | < 0.001              | 0.01%               | -0.20% ~ 0.50%                          | 0.74                        |
| Leukocytes  | 847.68707                                | 402.823~1558.544                                    | < 0.001                                 | 15623.98                       | 4219.969~28524.574                        | < 0.001                       | 16290.41              | 4770.277~29636.56                | < 0.001              | 5.28%               | 3.10% ~ 14.0%                           | < 0.001                     |
| NLR         | 600.704173                               | 257.246~1092.135                                    | < 0.001                                 | 14378.53                       | 1696.194~31819.72                         | 0.04                          | 14862.66              | 2166.079~32456.712               | 0.02                 | 3.79%               | 1.80% ~ 7.10%                           | 0.02                        |
| CRP         | 1587.08616                               | 892.246 ~ 2400.945                                  | 0.02                                    | 15821.76                       | 4269.829~31526.914                        | < 0.001                       | 15993.18              | 3388.256~30833.817               | < 0.001              | 9.92%               | 0.70%~17.1%                             | 0.02                        |

**Supplementary Table S20.2.** Mediation Effects of Inflammatory Biomarkers Linking Short Sleep Duration ( $\geq 9$  h) to REDs (Reference: 7 h)

| Mediator    | Average Causal Mediation Effect Estimate | Average Causal Mediation Effect Confidence Interval | Average Causal Mediation Effect P-value | Average Direct Effect Estimate | Average Direct Effect Confidence Interval | Average Direct Effect P-value | Total Effect Estimate | Total Effect Confidence Interval | Total Effect P-value | Proportion Mediated | Proportion Mediated Confidence Interval | Proportion Mediated P-value |
|-------------|------------------------------------------|-----------------------------------------------------|-----------------------------------------|--------------------------------|-------------------------------------------|-------------------------------|-----------------------|----------------------------------|----------------------|---------------------|-----------------------------------------|-----------------------------|
| Neutrophils | 2202.81185                               | 333.018~2371.591                                    | < 0.001                                 | 14934.03                       | 1138.953~35706.449                        | 0.02                          | 16977.09              | 1687.137~37443.032               | 0.02                 | 12.98%              | 8.10% ~ 37.20%                          | 0.02                        |

|                    |            |                    |         |          |                    |         |          |                     |         |       |                |         |
|--------------------|------------|--------------------|---------|----------|--------------------|---------|----------|---------------------|---------|-------|----------------|---------|
| <b>Leukocytes</b>  | 822.234802 | 555.96~1224.438    | < 0.001 | 14051.15 | 3072.975~31541.167 | 0.12    | 14798.99 | -2569.268~32050.155 | 0.12    | 5.56% | -              | 0.12    |
| <b>NLR</b>         | 264.32669  | 27.115~653.519     | 0.02    | 15029.29 | 1267.823~32170.241 | < 0.001 | 15245.7  | 1511.558~32368.868  | < 0.001 | 1.68% | 0.20% ~ 15.0%  | 0.02    |
| <b>Basophils</b>   | 0.8911883  | -158.165 ~ 172.358 | 0.92    | 16661.02 | 150.871~36005.65   | 0.06    | 16660.33 | 125.338~36094.877   | 0.06    | 0.03% | -1.20% ~ 1.30% | 0.86    |
| <b>Monocytes</b>   | 5.1342359  | -49.612 ~ 72.555   | 0.84    | 16434.35 | 233.308~34536.759  | 0.06    | 16430.36 | 228.223~34524.374   | 0.06    | 0.02% | -0.60% ~ 0.60% | 0.86    |
| <b>Eosinophils</b> | 7.633866   | -108.584 ~ 124.91  | 0.9     | 16028.46 | 2168.78~29115.399  | 0.02    | 16021.93 | 2179.356~29130.172  | 0.02    | 0.06% | -0.23% ~ 1.21% | 0.88    |
| <b>CRP</b>         | 1557.10573 | 942.45 ~ 2107.073  | 0.04    | 21952.88 | 9705.63~47001.339  | < 0.001 | 22714.07 | 9331.336~46368.575  | < 0.001 | 6.86% | 1.41% ~ 7.51%  | < 0.001 |

**Supplementary Table S20.3 Mediation Analysis of Inflammatory Biomarkers in the Association Between Night Shift Work and REDs**

| <b>Mediator</b>    | <b>Average Causal Mediation Effect Estimate</b> | <b>Average Causal Mediation Effect Confidence Interval</b> | <b>Average Causal Mediation Effect P-value</b> | <b>Average Direct Effect Estimate</b> | <b>Average Direct Effect Confidence Interval</b> | <b>Average Direct Effect P-value</b> | <b>Total Effect Estimate</b> | <b>Total Effect Confidence Interval</b> | <b>Total Effect P-value</b> | <b>Proportion Mediated</b> | <b>Proportion Mediated Confidence Interval</b> | <b>Proportion Mediated P-value</b> |
|--------------------|-------------------------------------------------|------------------------------------------------------------|------------------------------------------------|---------------------------------------|--------------------------------------------------|--------------------------------------|------------------------------|-----------------------------------------|-----------------------------|----------------------------|------------------------------------------------|------------------------------------|
| <b>Neutrophils</b> | 1391.46634                                      | 512.776 ~1935.637                                          | 0.04                                           | 20011.2                               | 5981.036~33938.065                               | < 0.001                              | 21240.99                     | 7312.242~35257.956                      | < 0.001                     | 6.55%                      | 3.60% ~ 12.70%                                 | 0.04                               |
| <b>Monocytes</b>   | 10.30997                                        | -39.703 ~ 61.624                                           | 0.74                                           | 19513.44                              | 8613.798~32453.382                               | < 0.001                              | 19519.32                     | 8626.902~32453.103 ~                    | < 0.001                     | 0.05%                      | -0.40% ~ 0.20%                                 | 0.74                               |
| <b>Basophils</b>   | 19.04493                                        | -28.995 ~ 159.734                                          | 0.9                                            | 19221.58                              | 5720.859~35562.143                               | < 0.001                              | 19210.11                     | 5701.792~35596.358                      | < 0.001                     | 0.10%                      | -1.10% ~ 1.40%                                 | 0.9                                |
| <b>Eosinophils</b> | 19.42077                                        | -14.711 ~ 105.136                                          | 0.64                                           | 22026.04                              | 4338.243~35479.82                                | 0.02                                 | 22013.02                     | 4285.121~35450.87                       | 0.02                        | 0.09%                      | -0.40% ~ 1.30%                                 | 0.62                               |
| <b>Leukocytes</b>  | 88.7466                                         | -3.96 ~ 210.652                                            | 0.08                                           | 19502.27                              | 6267.361~34558.874                               | 0.02                                 | 19556.37                     | 6359.194~34595.212                      | 0.02                        | 0.45%                      | -0.90% ~ 1.70%                                 | 0.1                                |
| <b>NLR</b>         | 357.06589                                       | 19.461 ~ 878.327                                           | 0.06                                           | 20209.02                              | 6301.533~38699.778                               | < 0.001                              | 20425.01                     | 6828.586~38913.953                      | < 0.001                     | 1.75%                      | -0.30% ~ 4.30%                                 | 0.06                               |
| <b>CRP</b>         | 102.49491                                       | -90.108 ~ 424.223                                          | 0.24                                           | 21298.31                              | 8064.924~33041.166                               | < 0.001                              | 21358.39                     | 8167.931~33040.441                      | < 0.001                     | 0.48%                      | -2.90% ~ 2.40%                                 | 0.24                               |

Note: NLR, Neutrophil-to-Lymphocyte Ratio. CRP, C-reactive Protein. REDs: reproductive endocrine diseases.

**Supplementary Table S21. Summary of Mendelian Randomization (MR) results for the association between sleep duration, sleep traits and reproductive endocrine diseases.**

| Exposure (GWAS) | ID | Outcome (GWAS)          | ID | Outcome                                          | Exposure           | Method                    | Number of SNPs Used | Causal Effect Estimate (Beta) | Standard Error of the Estimate | P-value | Lower 95% Confidence Interval for Beta | Upper 95% Confidence Interval for Beta | Odds Ratio (if applicable; exp(beta)) | Lower 95% Confidence Interval for Odds Ratio | Upper 95% Confidence Interval for Odds Ratio |
|-----------------|----|-------------------------|----|--------------------------------------------------|--------------------|---------------------------|---------------------|-------------------------------|--------------------------------|---------|----------------------------------------|----------------------------------------|---------------------------------------|----------------------------------------------|----------------------------------------------|
| ukb-b-5776      |    | ukb-b-10903             |    | endometriosis    id:ukb-b-10903                  | daytime sleepiness | MR Egger                  | 30                  | 0.0339                        | 0.0244                         | 0.1756  | -0.0139                                | 0.0818                                 | 1.0345                                | 0.9862                                       | 1.0853                                       |
| ukb-b-5776      |    | ukb-b-10903             |    | endometriosis    id:ukb-b-10903                  | daytime sleepiness | Weighted median           | 30                  | 0.0138                        | 0.0073                         | 0.0575  | -0.0004                                | 0.0280                                 | 1.0139                                | 0.9996                                       | 1.0284                                       |
| ukb-b-5776      |    | ukb-b-10903             |    | endometriosis    id:ukb-b-10903                  | daytime sleepiness | Inverse variance weighted | 30                  | 0.0033                        | 0.0055                         | 0.5484  | -0.0075                                | 0.0141                                 | 1.0033                                | 0.9925                                       | 1.0142                                       |
| ukb-b-5776      |    | ukb-b-10903             |    | endometriosis    id:ukb-b-10903                  | daytime sleepiness | Simple mode               | 30                  | 0.0185                        | 0.0140                         | 0.1955  | -0.0089                                | 0.0459                                 | 1.0187                                | 0.9912                                       | 1.0469                                       |
| ukb-b-5776      |    | ukb-b-10903             |    | endometriosis    id:ukb-b-10903                  | daytime sleepiness | Weighted mode             | 30                  | 0.0185                        | 0.0121                         | 0.1367  | -0.0052                                | 0.0422                                 | 1.0187                                | 0.9948                                       | 1.0431                                       |
| ukb-b-5776      |    | finn-b-N14_FEMALEINFERT |    | Female infertility    id:finn-b-N14_FEMALEINFERT | daytime sleepiness | MR Egger                  | 30                  | -0.4392                       | 2.7212                         | 0.8729  | -5.7728                                | 4.8943                                 | 0.6445                                | 0.0031                                       | 133.5248                                     |
| ukb-b-5776      |    | finn-b-N14_FEMALEINFERT |    | Female infertility    id:finn-b-N14_FEMALEINFERT | daytime sleepiness | Weighted median           | 30                  | 0.1142                        | 0.7586                         | 0.8804  | -1.3727                                | 1.6010                                 | 1.1209                                | 0.2534                                       | 4.9581                                       |
| ukb-b-5776      |    | finn-b-N14_FEMALEINFERT |    | Female infertility    id:finn-b-N14_FEMALEINFERT | daytime sleepiness | Inverse variance weighted | 30                  | 0.5226                        | 0.5923                         | 0.3776  | -0.6383                                | 1.6834                                 | 1.6863                                | 0.5282                                       | 5.3839                                       |
| ukb-b-5776      |    | finn-b-N14_FEMALEINFERT |    | Female infertility    id:finn-b-N14_FEMALEINFERT | daytime sleepiness | Simple mode               | 30                  | -0.5659                       | 1.5728                         | 0.7216  | -3.6485                                | 2.5168                                 | 0.5679                                | 0.0260                                       | 12.3884                                      |
| ukb-b-5776      |    | finn-b-N14_FEMALEINFERT |    | Female infertility    id:finn-b-N14_FEMALEINFERT | daytime sleepiness | Weighted mode             | 30                  | -0.3234                       | 1.3247                         | 0.8089  | -2.9197                                | 2.2730                                 | 0.7237                                | 0.0539                                       | 9.7087                                       |

|            |                    |                                                                       |                    |                           |    |         |        |        |          |        |        |        |         |
|------------|--------------------|-----------------------------------------------------------------------|--------------------|---------------------------|----|---------|--------|--------|----------|--------|--------|--------|---------|
| ukb-b-5776 | ukb-d-N94          | abnormal uterine bleeding    id:ukb-d-N94                             | daytime sleepiness | MR Egger                  | 30 | 0.0250  | 0.0168 | 0.1483 | -0.0080  | 0.0579 | 1.0253 | 0.9921 | 1.0596  |
| ukb-b-5776 | ukb-d-N94          | abnormal uterine bleeding    id:ukb-d-N94                             | daytime sleepiness | Weighted median           | 30 | 0.0049  | 0.0054 | 0.3639 | -0.0057  | 0.0155 | 1.0049 | 0.9943 | 1.0157  |
| ukb-b-5776 | ukb-d-N94          | abnormal uterine bleeding    id:ukb-d-N94                             | daytime sleepiness | Inverse variance weighted | 30 | 0.0042  | 0.0038 | 0.2591 | -0.0031  | 0.0116 | 1.0042 | 0.9969 | 1.0117  |
| ukb-b-5776 | ukb-d-N94          | abnormal uterine bleeding    id:ukb-d-N94                             | daytime sleepiness | Simple mode               | 30 | -0.0045 | 0.0111 | 0.6887 | -0.0262  | 0.0172 | 0.9955 | 0.9741 | 1.0174  |
| ukb-b-5776 | ukb-d-N94          | abnormal uterine bleeding    id:ukb-d-N94                             | daytime sleepiness | Weighted mode             | 30 | 0.0010  | 0.0099 | 0.9238 | -0.0185  | 0.0204 | 1.0010 | 0.9817 | 1.0206  |
| ukb-b-5776 | ebi-a-GCST90044902 | Polycystic ovary syndrome (adjusted for age)    id:ebi-a-GCST90044902 | daytime sleepiness | MR Egger                  | 30 | -4.4685 | 3.6784 | 0.2346 | -11.6782 | 2.7412 | 0.0115 | 0.0000 | 15.5057 |
| ukb-b-5776 | ebi-a-GCST90044902 | Polycystic ovary syndrome (adjusted for age)    id:ebi-a-GCST90044902 | daytime sleepiness | Weighted median           | 30 | -0.6905 | 1.0062 | 0.4926 | -2.6626  | 1.2817 | 0.5013 | 0.0698 | 3.6028  |
| ukb-b-5776 | ebi-a-GCST90044902 | Polycystic ovary syndrome (adjusted for age)    id:ebi-a-GCST90044902 | daytime sleepiness | Inverse variance weighted | 30 | -0.2339 | 0.8445 | 0.7818 | -1.8891  | 1.4213 | 0.7915 | 0.1512 | 4.1425  |
| ukb-b-5776 | ebi-a-GCST90044902 | Polycystic ovary syndrome (adjusted for age)    id:ebi-a-GCST90044902 | daytime sleepiness | Simple mode               | 30 | -1.2365 | 1.8332 | 0.5053 | -4.8295  | 2.3565 | 0.2904 | 0.0080 | 10.5535 |
| ukb-b-5776 | ebi-a-GCST90044902 | Polycystic ovary syndrome (adjusted for age)    id:ebi-a-GCST90044902 | daytime sleepiness | Weighted mode             | 30 | -1.2365 | 1.4798 | 0.4102 | -4.1369  | 1.6638 | 0.2904 | 0.0160 | 5.2795  |

|                        |                              |                                                        |                       |                                 |    |         |        |        |         |        |        |        |         |
|------------------------|------------------------------|--------------------------------------------------------|-----------------------|---------------------------------|----|---------|--------|--------|---------|--------|--------|--------|---------|
| ukb-b-5776             | finn-b-O15_ABORT_SPO<br>NTAN | Spontaneous abortion   <br>id:finn-b-O15_ABORT_SPONTAN | daytime<br>sleepiness | MR Egger                        | 30 | -0.5099 | 2.0980 | 0.8098 | -4.6219 | 3.6022 | 0.6006 | 0.0098 | 36.6789 |
| ukb-b-5776             | finn-b-O15_ABORT_SPO<br>NTAN | Spontaneous abortion   <br>id:finn-b-O15_ABORT_SPONTAN | daytime<br>sleepiness | Weighted<br>median              | 30 | 0.5511  | 0.6479 | 0.3950 | -0.7188 | 1.8210 | 1.7351 | 0.4873 | 6.1777  |
| ukb-b-5776             | finn-b-O15_ABORT_SPO<br>NTAN | Spontaneous abortion   <br>id:finn-b-O15_ABORT_SPONTAN | daytime<br>sleepiness | Inverse<br>variance<br>weighted | 30 | 0.0334  | 0.4561 | 0.9416 | -0.8606 | 0.9274 | 1.0340 | 0.4229 | 2.5279  |
| ukb-b-5776             | finn-b-O15_ABORT_SPO<br>NTAN | Spontaneous abortion   <br>id:finn-b-O15_ABORT_SPONTAN | daytime<br>sleepiness | Simple<br>mode                  | 30 | 0.9102  | 1.3710 | 0.5120 | -1.7770 | 3.5974 | 2.4848 | 0.1691 | 36.5035 |
| ukb-b-5776             | finn-b-O15_ABORT_SPO<br>NTAN | Spontaneous abortion   <br>id:finn-b-O15_ABORT_SPONTAN | daytime<br>sleepiness | Weighted<br>mode                | 30 | 1.2002  | 1.2752 | 0.3544 | -1.2992 | 3.6996 | 3.3209 | 0.2728 | 40.4327 |
| ebi-a-<br>GCST90018869 | ukb-b-10903                  | endometriosis    id:ukb-b-<br>10903                    | Insomnia              | MR Egger                        | 7  | 0.0002  | 0.0011 | 0.8376 | -0.0019 | 0.0023 | 1.0002 | 0.9981 | 1.0023  |
| ebi-a-<br>GCST90018869 | ukb-b-10903                  | endometriosis    id:ukb-b-<br>10903                    | Insomnia              | Weighted<br>median              | 7  | 0.0004  | 0.0004 | 0.4191 | -0.0005 | 0.0012 | 1.0004 | 0.9995 | 1.0012  |
| ebi-a-<br>GCST90018869 | ukb-b-10903                  | endometriosis    id:ukb-b-<br>10903                    | Insomnia              | Inverse<br>variance<br>weighted | 7  | 0.0002  | 0.0005 | 0.6307 | -0.0007 | 0.0012 | 1.0002 | 0.9993 | 1.0012  |
| ebi-a-<br>GCST90018869 | ukb-b-10903                  | endometriosis    id:ukb-b-<br>10903                    | Insomnia              | Simple<br>mode                  | 7  | 0.0010  | 0.0007 | 0.2131 | -0.0004 | 0.0024 | 1.0010 | 0.9996 | 1.0024  |
| ebi-a-<br>GCST90018869 | ukb-b-10903                  | endometriosis    id:ukb-b-<br>10903                    | Insomnia              | Weighted<br>mode                | 7  | 0.0005  | 0.0004 | 0.3126 | -0.0004 | 0.0013 | 1.0005 | 0.9996 | 1.0013  |

|                    |                         |                                                  |          |                           |    |         |        |        |         |        |        |        |        |
|--------------------|-------------------------|--------------------------------------------------|----------|---------------------------|----|---------|--------|--------|---------|--------|--------|--------|--------|
| ebi-a-GCST90018869 | finn-b-N14_FEMALEINFERT | Female infertility    id:finn-b-N14_FEMALEINFERT | Insomnia | MR Egger                  | 20 | -0.0176 | 0.0405 | 0.6687 | -0.0971 | 0.0618 | 0.9825 | 0.9075 | 1.0637 |
| ebi-a-GCST90018869 | finn-b-N14_FEMALEINFERT | Female infertility    id:finn-b-N14_FEMALEINFERT | Insomnia | Weighted median           | 20 | 0.0146  | 0.0335 | 0.6624 | -0.0511 | 0.0803 | 1.0147 | 0.9502 | 1.0837 |
| ebi-a-GCST90018869 | finn-b-N14_FEMALEINFERT | Female infertility    id:finn-b-N14_FEMALEINFERT | Insomnia | Inverse variance weighted | 20 | 0.0098  | 0.0218 | 0.6526 | -0.0329 | 0.0525 | 1.0099 | 0.9676 | 1.0539 |
| ebi-a-GCST90018869 | finn-b-N14_FEMALEINFERT | Female infertility    id:finn-b-N14_FEMALEINFERT | Insomnia | Simple mode               | 20 | 0.0186  | 0.0477 | 0.7012 | -0.0749 | 0.1120 | 1.0187 | 0.9278 | 1.1186 |
| ebi-a-GCST90018869 | finn-b-N14_FEMALEINFERT | Female infertility    id:finn-b-N14_FEMALEINFERT | Insomnia | Weighted mode             | 20 | 0.0161  | 0.0371 | 0.6682 | -0.0566 | 0.0888 | 1.0163 | 0.9450 | 1.0929 |
| ebi-a-GCST90018869 | ukb-d-N94               | abnormal uterine bleeding    id:ukb-d-N94        | Insomnia | MR Egger                  | 21 | 0.0000  | 0.0002 | 0.9104 | -0.0005 | 0.0004 | 1.0000 | 0.9995 | 1.0004 |
| ebi-a-GCST90018869 | ukb-d-N94               | abnormal uterine bleeding    id:ukb-d-N94        | Insomnia | Weighted median           | 21 | -0.0001 | 0.0002 | 0.4444 | -0.0005 | 0.0002 | 0.9999 | 0.9995 | 1.0002 |
| ebi-a-GCST90018869 | ukb-d-N94               | abnormal uterine bleeding    id:ukb-d-N94        | Insomnia | Inverse variance weighted | 21 | 0.0000  | 0.0001 | 0.7650 | -0.0003 | 0.0002 | 1.0000 | 0.9997 | 1.0002 |
| ebi-a-GCST90018869 | ukb-d-N94               | abnormal uterine bleeding    id:ukb-d-N94        | Insomnia | Simple mode               | 21 | -0.0001 | 0.0003 | 0.6068 | -0.0007 | 0.0004 | 0.9999 | 0.9993 | 1.0004 |

|                    |                           |                                                                       |          |                           |    |         |        |        |         |        |        |        |        |
|--------------------|---------------------------|-----------------------------------------------------------------------|----------|---------------------------|----|---------|--------|--------|---------|--------|--------|--------|--------|
| ebi-a-GCST90018869 | ukb-d-N94                 | abnormal uterine bleeding    id:ukb-d-N94                             | Insomnia | Weighted mode             | 21 | -0.0001 | 0.0002 | 0.6007 | -0.0005 | 0.0003 | 0.9999 | 0.9995 | 1.0003 |
| ebi-a-GCST90018869 | ebi-a-GCST90044902        | Polycystic ovary syndrome (adjusted for age)    id:ebi-a-GCST90044902 | Insomnia | MR Egger                  | 22 | 0.0007  | 0.0450 | 0.9869 | -0.0875 | 0.0890 | 1.0007 | 0.9162 | 1.0930 |
| ebi-a-GCST90018869 | ebi-a-GCST90044902        | Polycystic ovary syndrome (adjusted for age)    id:ebi-a-GCST90044902 | Insomnia | Weighted median           | 22 | 0.0163  | 0.0385 | 0.6723 | -0.0591 | 0.0917 | 1.0164 | 0.9426 | 1.0960 |
| ebi-a-GCST90018869 | ebi-a-GCST90044902        | Polycystic ovary syndrome (adjusted for age)    id:ebi-a-GCST90044902 | Insomnia | Inverse variance weighted | 22 | 0.0338  | 0.0251 | 0.1775 | -0.0153 | 0.0829 | 1.0344 | 0.9848 | 1.0864 |
| ebi-a-GCST90018869 | ebi-a-GCST90044902        | Polycystic ovary syndrome (adjusted for age)    id:ebi-a-GCST90044902 | Insomnia | Simple mode               | 22 | -0.0031 | 0.0641 | 0.9617 | -0.1287 | 0.1225 | 0.9969 | 0.8792 | 1.1303 |
| ebi-a-GCST90018869 | ebi-a-GCST90044902        | Polycystic ovary syndrome (adjusted for age)    id:ebi-a-GCST90044902 | Insomnia | Weighted mode             | 22 | 0.0064  | 0.0485 | 0.8965 | -0.0887 | 0.1015 | 1.0064 | 0.9151 | 1.1068 |
| ebi-a-GCST90018869 | finn-b-O15_ABORT_SPO NTAN | Spontaneous abortion    id:finn-b-O15_ABORT_SPONTAN                   | Insomnia | MR Egger                  | 20 | 0.0147  | 0.0390 | 0.7110 | -0.0618 | 0.0911 | 1.0148 | 0.9401 | 1.0954 |
| ebi-a-GCST90018869 | finn-b-O15_ABORT_SPO NTAN | Spontaneous abortion    id:finn-b-O15_ABORT_SPONTAN                   | Insomnia | Weighted median           | 20 | 0.0060  | 0.0285 | 0.8338 | -0.0500 | 0.0619 | 1.0060 | 0.9513 | 1.0639 |
| ebi-a-GCST90018869 | finn-b-O15_ABORT_SPO NTAN | Spontaneous abortion    id:finn-b-O15_ABORT_SPONTAN                   | Insomnia | Inverse variance weighted | 20 | -0.0060 | 0.0207 | 0.7710 | -0.0465 | 0.0345 | 0.9940 | 0.9546 | 1.0351 |

|                    |                              |                                                        |                     |                           |    |         |        |        |         |         |        |        |        |
|--------------------|------------------------------|--------------------------------------------------------|---------------------|---------------------------|----|---------|--------|--------|---------|---------|--------|--------|--------|
| ebi-a-GCST90018869 | finn-b-O15_ABORT_SPO<br>NTAN | Spontaneous abortion   <br>id:finn-b-O15_ABORT_SPONTAN | Insomnia            | Simple mode               | 20 | 0.0165  | 0.0546 | 0.7661 | -0.0905 | 0.1235  | 1.0166 | 0.9135 | 1.1314 |
| ebi-a-GCST90018869 | finn-b-O15_ABORT_SPO<br>NTAN | Spontaneous abortion   <br>id:finn-b-O15_ABORT_SPONTAN | Insomnia            | Weighted mode             | 20 | 0.0126  | 0.0324 | 0.7028 | -0.0510 | 0.0761  | 1.0126 | 0.9503 | 1.0791 |
| ebi-a-GCST006685   | ukb-b-10903                  | endometriosis    id:ukb-b-10903                        | long sleep duration | MR Egger                  | 11 | 0.0314  | 0.0558 | 0.5870 | -0.0780 | 0.1408  | 1.0319 | 0.9250 | 1.1512 |
| ebi-a-GCST006685   | ukb-b-10903                  | endometriosis    id:ukb-b-10903                        | long sleep duration | Weighted median           | 11 | -0.0186 | 0.0114 | 0.1033 | -0.0409 | 0.0038  | 0.9816 | 0.9599 | 1.0038 |
| ebi-a-GCST006685   | ukb-b-10903                  | endometriosis    id:ukb-b-10903                        | long sleep duration | Inverse variance weighted | 11 | -0.0175 | 0.0087 | 0.0454 | -0.0346 | -0.0004 | 0.9827 | 0.9660 | 0.9996 |
| ebi-a-GCST006685   | ukb-b-10903                  | endometriosis    id:ukb-b-10903                        | long sleep duration | Simple mode               | 11 | -0.0262 | 0.0177 | 0.1687 | -0.0609 | 0.0084  | 0.9741 | 0.9409 | 1.0085 |
| ebi-a-GCST006685   | ukb-b-10903                  | endometriosis    id:ukb-b-10903                        | long sleep duration | Weighted mode             | 11 | -0.0253 | 0.0187 | 0.2060 | -0.0619 | 0.0113  | 0.9750 | 0.9400 | 1.0114 |
| ebi-a-GCST006685   | finn-b-N14_FEMALEINF<br>ERT  | Female infertility    id:finn-b-N14_FEMALEINFERT       | long sleep duration | MR Egger                  | 28 | -0.0616 | 0.4269 | 0.8863 | -0.8983 | 0.7750  | 0.9402 | 0.4073 | 2.1706 |
| ebi-a-GCST006685   | finn-b-N14_FEMALEINF<br>ERT  | Female infertility    id:finn-b-N14_FEMALEINFERT       | long sleep duration | Weighted median           | 28 | -0.0424 | 0.3825 | 0.9117 | -0.7921 | 0.7073  | 0.9585 | 0.4529 | 2.0285 |
| ebi-a-GCST006685   | finn-b-N14_FEMALEINF<br>ERT  | Female infertility    id:finn-b-N14_FEMALEINFERT       | long sleep duration | Inverse variance weighted | 28 | -0.1958 | 0.3386 | 0.5631 | -0.8594 | 0.4678  | 0.8222 | 0.4234 | 1.5965 |

|                  |                         |                                                                       |                     |                           |    |         |        |        |         |        |        |        |        |
|------------------|-------------------------|-----------------------------------------------------------------------|---------------------|---------------------------|----|---------|--------|--------|---------|--------|--------|--------|--------|
| ebi-a-GCST006685 | finn-b-N14_FEMALEINFERT | Female infertility    id:finn-b-N14_FEMALEINFERT                      | long sleep duration | Simple mode               | 28 | -1.6658 | 1.1838 | 0.1708 | -3.9860 | 0.6543 | 0.1890 | 0.0186 | 1.9239 |
| ebi-a-GCST006685 | finn-b-N14_FEMALEINFERT | Female infertility    id:finn-b-N14_FEMALEINFERT                      | long sleep duration | Weighted mode             | 28 | -0.0777 | 0.3615 | 0.8313 | -0.7862 | 0.6307 | 0.9252 | 0.4556 | 1.8789 |
| ebi-a-GCST006685 | ukb-d-N94               | abnormal uterine bleeding    id:ukb-d-N94                             | long sleep duration | MR Egger                  | 28 | -0.0063 | 0.0082 | 0.4496 | -0.0222 | 0.0097 | 0.9938 | 0.9780 | 1.0098 |
| ebi-a-GCST006685 | ukb-d-N94               | abnormal uterine bleeding    id:ukb-d-N94                             | long sleep duration | Weighted median           | 28 | 0.0054  | 0.0056 | 0.3332 | -0.0056 | 0.0164 | 1.0054 | 0.9945 | 1.0165 |
| ebi-a-GCST006685 | ukb-d-N94               | abnormal uterine bleeding    id:ukb-d-N94                             | long sleep duration | Inverse variance weighted | 28 | 0.0036  | 0.0041 | 0.3777 | -0.0044 | 0.0116 | 1.0036 | 0.9956 | 1.0116 |
| ebi-a-GCST006685 | ukb-d-N94               | abnormal uterine bleeding    id:ukb-d-N94                             | long sleep duration | Simple mode               | 28 | 0.0106  | 0.0126 | 0.4079 | -0.0141 | 0.0352 | 1.0106 | 0.9860 | 1.0358 |
| ebi-a-GCST006685 | ukb-d-N94               | abnormal uterine bleeding    id:ukb-d-N94                             | long sleep duration | Weighted mode             | 28 | 0.0115  | 0.0122 | 0.3540 | -0.0124 | 0.0354 | 1.0116 | 0.9877 | 1.0360 |
| ebi-a-GCST006685 | ebi-a-GCST90044902      | Polycystic ovary syndrome (adjusted for age)    id:ebi-a-GCST90044902 | long sleep duration | MR Egger                  | 28 | 0.2350  | 0.6869 | 0.7350 | -1.1113 | 1.5812 | 1.2649 | 0.3291 | 4.8610 |
| ebi-a-GCST006685 | ebi-a-GCST90044902      | Polycystic ovary syndrome (adjusted for age)    id:ebi-a-GCST90044902 | long sleep duration | Weighted median           | 28 | -0.0531 | 0.7116 | 0.9405 | -1.4479 | 1.3417 | 0.9483 | 0.2351 | 3.8256 |

|                  |                              |                                                                       |                        |                           |     |         |        |        |         |         |        |        |         |
|------------------|------------------------------|-----------------------------------------------------------------------|------------------------|---------------------------|-----|---------|--------|--------|---------|---------|--------|--------|---------|
| ebi-a-GCST006685 | ebi-a-GCST90044902           | Polycystic ovary syndrome (adjusted for age)    id:ebi-a-GCST90044902 | long sleep duration    | Inverse variance weighted | 28  | 0.0243  | 0.5135 | 0.9623 | -0.9823 | 1.0308  | 1.0246 | 0.3745 | 2.8034  |
| ebi-a-GCST006685 | ebi-a-GCST90044902           | Polycystic ovary syndrome (adjusted for age)    id:ebi-a-GCST90044902 | long sleep duration    | Simple mode               | 28  | -0.0903 | 1.7062 | 0.9582 | -3.4345 | 3.2540  | 0.9137 | 0.0322 | 25.8929 |
| ebi-a-GCST006685 | ebi-a-GCST90044902           | Polycystic ovary syndrome (adjusted for age)    id:ebi-a-GCST90044902 | long sleep duration    | Weighted mode             | 28  | -0.0903 | 0.6671 | 0.8934 | -1.3978 | 1.2172  | 0.9137 | 0.2471 | 3.3778  |
| ebi-a-GCST006685 | finn-b-O15_ABORT_SPO<br>NTAN | Spontaneous abortion    id:finn-b-O15_ABORT_SPONTAN                   | long sleep duration    | MR Egger                  | 28  | -0.6589 | 0.3216 | 0.0507 | -1.2892 | -0.0286 | 0.5174 | 0.2755 | 0.9718  |
| ebi-a-GCST006685 | finn-b-O15_ABORT_SPO<br>NTAN | Spontaneous abortion    id:finn-b-O15_ABORT_SPONTAN                   | long sleep duration    | Weighted median           | 28  | -0.6435 | 0.3693 | 0.0814 | -1.3675 | 0.0804  | 0.5254 | 0.2548 | 1.0837  |
| ebi-a-GCST006685 | finn-b-O15_ABORT_SPO<br>NTAN | Spontaneous abortion    id:finn-b-O15_ABORT_SPONTAN                   | long sleep duration    | Inverse variance weighted | 28  | -0.5362 | 0.2585 | 0.0380 | -1.0427 | -0.0296 | 0.5850 | 0.3525 | 0.9709  |
| ebi-a-GCST006685 | finn-b-O15_ABORT_SPO<br>NTAN | Spontaneous abortion    id:finn-b-O15_ABORT_SPONTAN                   | long sleep duration    | Simple mode               | 28  | -0.7786 | 0.9015 | 0.3954 | -2.5456 | 0.9884  | 0.4590 | 0.0784 | 2.6869  |
| ebi-a-GCST006685 | finn-b-O15_ABORT_SPO<br>NTAN | Spontaneous abortion    id:finn-b-O15_ABORT_SPONTAN                   | long sleep duration    | Weighted mode             | 28  | -0.5964 | 0.3460 | 0.0962 | -1.2746 | 0.0817  | 0.5508 | 0.2795 | 1.0852  |
| ukb-b-4956       | ukb-b-10903                  | endometriosis    id:ukb-b-10903                                       | Morning/evening person | MR Egger                  | 119 | 0.0077  | 0.0057 | 0.1829 | -0.0035 | 0.0189  | 1.0077 | 0.9965 | 1.0191  |

|            |                         |                                                  |                        |                           |     |         |        |        |         |        |        |        |        |
|------------|-------------------------|--------------------------------------------------|------------------------|---------------------------|-----|---------|--------|--------|---------|--------|--------|--------|--------|
| ukb-b-4956 | ukb-b-10903             | endometriosis    id:ukb-b-10903                  | Morning/evening person | Weighted median           | 119 | 0.0007  | 0.0018 | 0.6933 | -0.0028 | 0.0042 | 1.0007 | 0.9972 | 1.0042 |
| ukb-b-4956 | ukb-b-10903             | endometriosis    id:ukb-b-10903                  | Morning/evening person | Inverse variance weighted | 119 | 0.0007  | 0.0013 | 0.5928 | -0.0018 | 0.0032 | 1.0007 | 0.9982 | 1.0032 |
| ukb-b-4956 | ukb-b-10903             | endometriosis    id:ukb-b-10903                  | Morning/evening person | Simple mode               | 119 | 0.0014  | 0.0051 | 0.7800 | -0.0085 | 0.0114 | 1.0014 | 0.9915 | 1.0114 |
| ukb-b-4956 | ukb-b-10903             | endometriosis    id:ukb-b-10903                  | Morning/evening person | Weighted mode             | 119 | 0.0012  | 0.0046 | 0.7892 | -0.0077 | 0.0101 | 1.0012 | 0.9923 | 1.0102 |
| ukb-b-4956 | finn-b-N14_FEMALEINFERT | Female infertility    id:finn-b-N14_FEMALEINFERT | Morning/evening person | MR Egger                  | 134 | -0.1786 | 0.3827 | 0.6415 | -0.9287 | 0.5715 | 0.8365 | 0.3951 | 1.7710 |
| ukb-b-4956 | finn-b-N14_FEMALEINFERT | Female infertility    id:finn-b-N14_FEMALEINFERT | Morning/evening person | Weighted median           | 134 | -0.0999 | 0.1801 | 0.5790 | -0.4530 | 0.2531 | 0.9049 | 0.6357 | 1.2880 |
| ukb-b-4956 | finn-b-N14_FEMALEINFERT | Female infertility    id:finn-b-N14_FEMALEINFERT | Morning/evening person | Inverse variance weighted | 134 | -0.0874 | 0.1245 | 0.4827 | -0.3315 | 0.1567 | 0.9163 | 0.7178 | 1.1696 |
| ukb-b-4956 | finn-b-N14_FEMALEINFERT | Female infertility    id:finn-b-N14_FEMALEINFERT | Morning/evening person | Simple mode               | 134 | 0.1844  | 0.5671 | 0.7456 | -0.9271 | 1.2958 | 1.2024 | 0.3957 | 3.6539 |
| ukb-b-4956 | finn-b-N14_FEMALEINFERT | Female infertility    id:finn-b-N14_FEMALEINFERT | Morning/evening person | Weighted mode             | 134 | 0.4124  | 0.4889 | 0.4004 | -0.5457 | 1.3706 | 1.5105 | 0.5794 | 3.9378 |
| ukb-b-4956 | ukb-d-N94               | abnormal uterine bleeding    id:ukb-d-N94        | Morning/evening person | MR Egger                  | 136 | 0.0002  | 0.0026 | 0.9261 | -0.0049 | 0.0054 | 1.0002 | 0.9951 | 1.0054 |

|            |                    |                                                                       |                         |                           |     |         |        |        |         |        |        |        |        |
|------------|--------------------|-----------------------------------------------------------------------|-------------------------|---------------------------|-----|---------|--------|--------|---------|--------|--------|--------|--------|
| ukb-b-4956 | ukb-d-N94          | abnormal uterine bleeding    id:ukb-d-N94                             | Morning/ev ening person | Weighted median           | 136 | -0.0003 | 0.0013 | 0.7939 | -0.0029 | 0.0022 | 0.9997 | 0.9971 | 1.0022 |
| ukb-b-4956 | ukb-d-N94          | abnormal uterine bleeding    id:ukb-d-N94                             | Morning/ev ening person | Inverse variance weighted | 136 | 0.0006  | 0.0009 | 0.4725 | -0.0011 | 0.0023 | 1.0006 | 0.9989 | 1.0023 |
| ukb-b-4956 | ukb-d-N94          | abnormal uterine bleeding    id:ukb-d-N94                             | Morning/ev ening person | Simple mode               | 136 | -0.0022 | 0.0034 | 0.5212 | -0.0089 | 0.0045 | 0.9978 | 0.9911 | 1.0045 |
| ukb-b-4956 | ukb-d-N94          | abnormal uterine bleeding    id:ukb-d-N94                             | Morning/ev ening person | Weighted mode             | 136 | -0.0012 | 0.0029 | 0.6794 | -0.0068 | 0.0044 | 0.9988 | 0.9933 | 1.0044 |
| ukb-b-4956 | ebi-a-GCST90044902 | Polycystic ovary syndrome (adjusted for age)    id:ebi-a-GCST90044902 | Morning/ev ening person | MR Egger                  | 135 | 0.0485  | 0.4865 | 0.9207 | -0.9051 | 1.0021 | 1.0497 | 0.4045 | 2.7241 |
| ukb-b-4956 | ebi-a-GCST90044902 | Polycystic ovary syndrome (adjusted for age)    id:ebi-a-GCST90044902 | Morning/ev ening person | Weighted median           | 135 | 0.1576  | 0.2332 | 0.4991 | -0.2994 | 0.6147 | 1.1707 | 0.7413 | 1.8490 |
| ukb-b-4956 | ebi-a-GCST90044902 | Polycystic ovary syndrome (adjusted for age)    id:ebi-a-GCST90044902 | Morning/ev ening person | Inverse variance weighted | 135 | 0.1075  | 0.1621 | 0.5074 | -0.2103 | 0.4253 | 1.1135 | 0.8103 | 1.5300 |
| ukb-b-4956 | ebi-a-GCST90044902 | Polycystic ovary syndrome (adjusted for age)    id:ebi-a-GCST90044902 | Morning/ev ening person | Simple mode               | 135 | -0.4497 | 0.6765 | 0.5074 | -1.7757 | 0.8763 | 0.6378 | 0.1694 | 2.4020 |
| ukb-b-4956 | ebi-a-GCST90044902 | Polycystic ovary syndrome (adjusted for age)    id:ebi-a-GCST90044902 | Morning/ev ening person | Weighted mode             | 135 | 0.6166  | 0.6478 | 0.3429 | -0.6531 | 1.8862 | 1.8525 | 0.5205 | 6.5940 |

|            |                              |                                                        |                               |                                 |     |         |        |        |         |        |        |        |        |
|------------|------------------------------|--------------------------------------------------------|-------------------------------|---------------------------------|-----|---------|--------|--------|---------|--------|--------|--------|--------|
| ukb-b-4956 | finn-b-O15_ABORT_SPO<br>NTAN | Spontaneous abortion   <br>id:finn-b-O15_ABORT_SPONTAN | Morning/ev<br>ening<br>person | MR Egger                        | 134 | 0.0944  | 0.2980 | 0.7519 | -0.4897 | 0.6785 | 1.0990 | 0.6128 | 1.9709 |
| ukb-b-4956 | finn-b-O15_ABORT_SPO<br>NTAN | Spontaneous abortion   <br>id:finn-b-O15_ABORT_SPONTAN | Morning/ev<br>ening<br>person | Weighted<br>median              | 134 | 0.2452  | 0.1466 | 0.0943 | -0.0421 | 0.5324 | 1.2778 | 0.9588 | 1.7031 |
| ukb-b-4956 | finn-b-O15_ABORT_SPO<br>NTAN | Spontaneous abortion   <br>id:finn-b-O15_ABORT_SPONTAN | Morning/ev<br>ening<br>person | Inverse<br>variance<br>weighted | 134 | 0.2401  | 0.0974 | 0.0137 | 0.0492  | 0.4311 | 1.2714 | 1.0504 | 1.5389 |
| ukb-b-4956 | finn-b-O15_ABORT_SPO<br>NTAN | Spontaneous abortion   <br>id:finn-b-O15_ABORT_SPONTAN | Morning/ev<br>ening<br>person | Simple<br>mode                  | 134 | -0.1531 | 0.3918 | 0.6966 | -0.9210 | 0.6148 | 0.8580 | 0.3981 | 1.8493 |
| ukb-b-4956 | finn-b-O15_ABORT_SPO<br>NTAN | Spontaneous abortion   <br>id:finn-b-O15_ABORT_SPONTAN | Morning/ev<br>ening<br>person | Weighted<br>mode                | 134 | 0.1875  | 0.3330 | 0.5744 | -0.4653 | 0.8402 | 1.2062 | 0.6280 | 2.3169 |
| ukb-b-4616 | ukb-b-10903                  | endometriosis    id:ukb-b-<br>10903                    | Nap during<br>day             | MR Egger                        | 81  | 0.0052  | 0.0083 | 0.5330 | -0.0111 | 0.0216 | 1.0052 | 0.9889 | 1.0218 |
| ukb-b-4616 | ukb-b-10903                  | endometriosis    id:ukb-b-<br>10903                    | Nap during<br>day             | Weighted<br>median              | 81  | 0.0053  | 0.0037 | 0.1591 | -0.0021 | 0.0126 | 1.0053 | 0.9979 | 1.0126 |
| ukb-b-4616 | ukb-b-10903                  | endometriosis    id:ukb-b-<br>10903                    | Nap during<br>day             | Inverse<br>variance<br>weighted | 81  | 0.0006  | 0.0024 | 0.8131 | -0.0042 | 0.0054 | 1.0006 | 0.9958 | 1.0054 |
| ukb-b-4616 | ukb-b-10903                  | endometriosis    id:ukb-b-<br>10903                    | Nap during<br>day             | Simple<br>mode                  | 81  | 0.0099  | 0.0087 | 0.2591 | -0.0072 | 0.0271 | 1.0100 | 0.9928 | 1.0274 |
| ukb-b-4616 | ukb-b-10903                  | endometriosis    id:ukb-b-<br>10903                    | Nap during<br>day             | Weighted<br>mode                | 81  | 0.0087  | 0.0080 | 0.2795 | -0.0070 | 0.0245 | 1.0088 | 0.9930 | 1.0248 |

|            |                         |                                                  |                |                           |    |         |        |        |         |        |        |        |        |
|------------|-------------------------|--------------------------------------------------|----------------|---------------------------|----|---------|--------|--------|---------|--------|--------|--------|--------|
| ukb-b-4616 | finn-b-N14_FEMALEINFERT | Female infertility    id:finn-b-N14_FEMALEINFERT | Nap during day | MR Egger                  | 83 | -0.2182 | 0.9018 | 0.8094 | -1.9857 | 1.5492 | 0.8039 | 0.1373 | 4.7078 |
| ukb-b-4616 | finn-b-N14_FEMALEINFERT | Female infertility    id:finn-b-N14_FEMALEINFERT | Nap during day | Weighted median           | 83 | 0.1679  | 0.3953 | 0.6712 | -0.6070 | 0.9427 | 1.1828 | 0.5450 | 2.5670 |
| ukb-b-4616 | finn-b-N14_FEMALEINFERT | Female infertility    id:finn-b-N14_FEMALEINFERT | Nap during day | Inverse variance weighted | 83 | 0.2319  | 0.2554 | 0.3638 | -0.2687 | 0.7326 | 1.2611 | 0.7644 | 2.0804 |
| ukb-b-4616 | finn-b-N14_FEMALEINFERT | Female infertility    id:finn-b-N14_FEMALEINFERT | Nap during day | Simple mode               | 83 | -0.0913 | 1.0170 | 0.9287 | -2.0847 | 1.9021 | 0.9127 | 0.1243 | 6.6999 |
| ukb-b-4616 | finn-b-N14_FEMALEINFERT | Female infertility    id:finn-b-N14_FEMALEINFERT | Nap during day | Weighted mode             | 83 | -0.0214 | 0.9031 | 0.9812 | -1.7915 | 1.7487 | 0.9788 | 0.1667 | 5.7471 |
| ukb-b-4616 | ukb-d-N94               | abnormal uterine bleeding    id:ukb-d-N94        | Nap during day | MR Egger                  | 85 | 0.0101  | 0.0060 | 0.0963 | -0.0017 | 0.0219 | 1.0102 | 0.9983 | 1.0221 |
| ukb-b-4616 | ukb-d-N94               | abnormal uterine bleeding    id:ukb-d-N94        | Nap during day | Weighted median           | 85 | 0.0062  | 0.0028 | 0.0283 | 0.0007  | 0.0118 | 1.0062 | 1.0007 | 1.0119 |
| ukb-b-4616 | ukb-d-N94               | abnormal uterine bleeding    id:ukb-d-N94        | Nap during day | Inverse variance weighted | 85 | 0.0060  | 0.0018 | 0.0008 | 0.0025  | 0.0095 | 1.0060 | 1.0025 | 1.0096 |
| ukb-b-4616 | ukb-d-N94               | abnormal uterine bleeding    id:ukb-d-N94        | Nap during day | Simple mode               | 85 | 0.0018  | 0.0059 | 0.7650 | -0.0099 | 0.0134 | 1.0018 | 0.9902 | 1.0135 |

|            |                           |                                                                       |                |                           |    |         |        |        |         |        |        |        |         |
|------------|---------------------------|-----------------------------------------------------------------------|----------------|---------------------------|----|---------|--------|--------|---------|--------|--------|--------|---------|
| ukb-b-4616 | ukb-d-N94                 | abnormal uterine bleeding    id:ukb-d-N94                             | Nap during day | Weighted mode             | 85 | 0.0083  | 0.0046 | 0.0736 | -0.0007 | 0.0173 | 1.0083 | 0.9993 | 1.0174  |
| ukb-b-4616 | ebi-a-GCST90044902        | Polycystic ovary syndrome (adjusted for age)    id:ebi-a-GCST90044902 | Nap during day | MR Egger                  | 84 | -1.2672 | 1.1357 | 0.2678 | -3.4931 | 0.9588 | 0.2816 | 0.0304 | 2.6086  |
| ukb-b-4616 | ebi-a-GCST90044902        | Polycystic ovary syndrome (adjusted for age)    id:ebi-a-GCST90044902 | Nap during day | Weighted median           | 84 | -0.3801 | 0.5004 | 0.4475 | -1.3609 | 0.6006 | 0.6838 | 0.2564 | 1.8233  |
| ukb-b-4616 | ebi-a-GCST90044902        | Polycystic ovary syndrome (adjusted for age)    id:ebi-a-GCST90044902 | Nap during day | Inverse variance weighted | 84 | -0.1001 | 0.3328 | 0.7637 | -0.7524 | 0.5523 | 0.9048 | 0.4712 | 1.7372  |
| ukb-b-4616 | ebi-a-GCST90044902        | Polycystic ovary syndrome (adjusted for age)    id:ebi-a-GCST90044902 | Nap during day | Simple mode               | 84 | 0.2395  | 1.1590 | 0.8368 | -2.0321 | 2.5111 | 1.2706 | 0.1311 | 12.3185 |
| ukb-b-4616 | ebi-a-GCST90044902        | Polycystic ovary syndrome (adjusted for age)    id:ebi-a-GCST90044902 | Nap during day | Weighted mode             | 84 | -0.3675 | 0.9101 | 0.6874 | -2.1512 | 1.4162 | 0.6925 | 0.1163 | 4.1216  |
| ukb-b-4616 | finn-b-O15_ABORT_SPO NTAN | Spontaneous abortion    id:finn-b-O15_ABORT_SPONTAN                   | Nap during day | MR Egger                  | 83 | -0.6224 | 0.7825 | 0.4287 | -2.1561 | 0.9113 | 0.5367 | 0.1158 | 2.4875  |
| ukb-b-4616 | finn-b-O15_ABORT_SPO NTAN | Spontaneous abortion    id:finn-b-O15_ABORT_SPONTAN                   | Nap during day | Weighted median           | 83 | -0.4785 | 0.3094 | 0.1220 | -1.0850 | 0.1279 | 0.6197 | 0.3379 | 1.1365  |
| ukb-b-4616 | finn-b-O15_ABORT_SPO NTAN | Spontaneous abortion    id:finn-b-O15_ABORT_SPONTAN                   | Nap during day | Inverse variance weighted | 83 | -0.3027 | 0.2214 | 0.1717 | -0.7367 | 0.1313 | 0.7388 | 0.4787 | 1.1404  |

|                      |                                 |                                                        |                         |                                 |    |         |        |        |         |        |        |        |        |
|----------------------|---------------------------------|--------------------------------------------------------|-------------------------|---------------------------------|----|---------|--------|--------|---------|--------|--------|--------|--------|
| ukb-b-4616           | finn-b-O15_ABORT_SPO<br>NTAN    | Spontaneous abortion   <br>id:finn-b-O15_ABORT_SPONTAN | Nap during<br>day       | Simple<br>mode                  | 83 | -0.6560 | 0.8531 | 0.4441 | -2.3281 | 1.0161 | 0.5189 | 0.0975 | 2.7624 |
| ukb-b-4616           | finn-b-O15_ABORT_SPO<br>NTAN    | Spontaneous abortion   <br>id:finn-b-O15_ABORT_SPONTAN | Nap during<br>day       | Weighted<br>mode                | 83 | -0.7506 | 0.7397 | 0.3132 | -2.2005 | 0.6992 | 0.4721 | 0.1107 | 2.0122 |
| ebi-a-<br>GCST006686 | ukb-b-10903                     | endometriosis    id:ukb-b-<br>10903                    | short sleep<br>duration | MR Egger                        | 12 | 0.0051  | 0.0337 | 0.8832 | -0.0610 | 0.0712 | 1.0051 | 0.9408 | 1.0738 |
| ebi-a-<br>GCST006686 | ukb-b-10903                     | endometriosis    id:ukb-b-<br>10903                    | short sleep<br>duration | Weighted<br>median              | 12 | -0.0051 | 0.0078 | 0.5172 | -0.0204 | 0.0102 | 0.9950 | 0.9799 | 1.0103 |
| ebi-a-<br>GCST006686 | ukb-b-10903                     | endometriosis    id:ukb-b-<br>10903                    | short sleep<br>duration | Inverse<br>variance<br>weighted | 12 | -0.0022 | 0.0062 | 0.7283 | -0.0144 | 0.0101 | 0.9978 | 0.9857 | 1.0101 |
| ebi-a-<br>GCST006686 | ukb-b-10903                     | endometriosis    id:ukb-b-<br>10903                    | short sleep<br>duration | Simple<br>mode                  | 12 | -0.0105 | 0.0139 | 0.4661 | -0.0378 | 0.0168 | 0.9895 | 0.9629 | 1.0169 |
| ebi-a-<br>GCST006686 | ukb-b-10903                     | endometriosis    id:ukb-b-<br>10903                    | short sleep<br>duration | Weighted<br>mode                | 12 | -0.0095 | 0.0132 | 0.4852 | -0.0353 | 0.0163 | 0.9905 | 0.9653 | 1.0164 |
| ebi-a-<br>GCST006686 | finn-b-<br>N14_FEMALEINF<br>ERT | Female infertility    id:finn-b-<br>N14_FEMALEINFERT   | short sleep<br>duration | MR Egger                        | 23 | 0.0915  | 0.8014 | 0.9102 | -1.4793 | 1.6622 | 1.0958 | 0.2278 | 5.2710 |
| ebi-a-<br>GCST006686 | finn-b-<br>N14_FEMALEINF<br>ERT | Female infertility    id:finn-b-<br>N14_FEMALEINFERT   | short sleep<br>duration | Weighted<br>median              | 23 | 0.0707  | 0.6195 | 0.9091 | -1.1436 | 1.2850 | 1.0733 | 0.3187 | 3.6148 |
| ebi-a-<br>GCST006686 | finn-b-<br>N14_FEMALEINF<br>ERT | Female infertility    id:finn-b-<br>N14_FEMALEINFERT   | short sleep<br>duration | Inverse<br>variance<br>weighted | 23 | -0.0280 | 0.4115 | 0.9458 | -0.8346 | 0.7786 | 0.9724 | 0.4340 | 2.1785 |

|                  |                         |                                                                       |                      |                           |    |         |        |        |         |        |        |        |         |
|------------------|-------------------------|-----------------------------------------------------------------------|----------------------|---------------------------|----|---------|--------|--------|---------|--------|--------|--------|---------|
| ebi-a-GCST006686 | finn-b-N14_FEMALEINFERT | Female infertility    id:finn-b-N14_FEMALEINFERT                      | short sleep duration | Simple mode               | 23 | -0.5468 | 1.0611 | 0.6115 | -2.6265 | 1.5329 | 0.5788 | 0.0723 | 4.6317  |
| ebi-a-GCST006686 | finn-b-N14_FEMALEINFERT | Female infertility    id:finn-b-N14_FEMALEINFERT                      | short sleep duration | Weighted mode             | 23 | 0.3980  | 0.7826 | 0.6161 | -1.1359 | 1.9319 | 1.4889 | 0.3211 | 6.9027  |
| ebi-a-GCST006686 | ukb-d-N94               | abnormal uterine bleeding    id:ukb-d-N94                             | short sleep duration | MR Egger                  | 23 | 0.0106  | 0.0096 | 0.2834 | -0.0083 | 0.0295 | 1.0107 | 0.9918 | 1.0300  |
| ebi-a-GCST006686 | ukb-d-N94               | abnormal uterine bleeding    id:ukb-d-N94                             | short sleep duration | Weighted median           | 23 | -0.0015 | 0.0051 | 0.7733 | -0.0115 | 0.0086 | 0.9985 | 0.9885 | 1.0086  |
| ebi-a-GCST006686 | ukb-d-N94               | abnormal uterine bleeding    id:ukb-d-N94                             | short sleep duration | Inverse variance weighted | 23 | 0.0008  | 0.0043 | 0.8522 | -0.0077 | 0.0093 | 1.0008 | 0.9923 | 1.0093  |
| ebi-a-GCST006686 | ukb-d-N94               | abnormal uterine bleeding    id:ukb-d-N94                             | short sleep duration | Simple mode               | 23 | -0.0023 | 0.0098 | 0.8194 | -0.0215 | 0.0170 | 0.9977 | 0.9787 | 1.0171  |
| ebi-a-GCST006686 | ukb-d-N94               | abnormal uterine bleeding    id:ukb-d-N94                             | short sleep duration | Weighted mode             | 23 | -0.0023 | 0.0093 | 0.8098 | -0.0205 | 0.0160 | 0.9977 | 0.9797 | 1.0161  |
| ebi-a-GCST006686 | ebi-a-GCST90044902      | Polycystic ovary syndrome (adjusted for age)    id:ebi-a-GCST90044902 | short sleep duration | MR Egger                  | 24 | -0.1511 | 1.3718 | 0.9133 | -2.8399 | 2.5377 | 0.8597 | 0.0584 | 12.6505 |
| ebi-a-GCST006686 | ebi-a-GCST90044902      | Polycystic ovary syndrome (adjusted for age)    id:ebi-a-GCST90044902 | short sleep duration | Weighted median           | 24 | -0.5365 | 0.8213 | 0.5136 | -2.1462 | 1.0732 | 0.5848 | 0.1169 | 2.9248  |

|                  |                              |                                                                       |                      |                           |    |         |        |        |         |        |        |        |         |
|------------------|------------------------------|-----------------------------------------------------------------------|----------------------|---------------------------|----|---------|--------|--------|---------|--------|--------|--------|---------|
| ebi-a-GCST006686 | ebi-a-GCST90044902           | Polycystic ovary syndrome (adjusted for age)    id:ebi-a-GCST90044902 | short sleep duration | Inverse variance weighted | 24 | -0.5171 | 0.6584 | 0.4322 | -1.8077 | 0.7734 | 0.5962 | 0.1640 | 2.1671  |
| ebi-a-GCST006686 | ebi-a-GCST90044902           | Polycystic ovary syndrome (adjusted for age)    id:ebi-a-GCST90044902 | short sleep duration | Simple mode               | 24 | -0.3799 | 1.5534 | 0.8090 | -3.4245 | 2.6648 | 0.6840 | 0.0326 | 14.3646 |
| ebi-a-GCST006686 | ebi-a-GCST90044902           | Polycystic ovary syndrome (adjusted for age)    id:ebi-a-GCST90044902 | short sleep duration | Weighted mode             | 24 | -0.0954 | 1.2109 | 0.9379 | -2.4688 | 2.2780 | 0.9090 | 0.0847 | 9.7572  |
| ebi-a-GCST006686 | finn-b-O15_ABORT_SPO<br>NTAN | Spontaneous abortion    id:finn-b-O15_ABORT_SPONTAN                   | short sleep duration | MR Egger                  | 23 | 0.7086  | 0.6759 | 0.3063 | -0.6161 | 2.0334 | 2.0312 | 0.5401 | 7.6397  |
| ebi-a-GCST006686 | finn-b-O15_ABORT_SPO<br>NTAN | Spontaneous abortion    id:finn-b-O15_ABORT_SPONTAN                   | short sleep duration | Weighted median           | 23 | 0.7106  | 0.5387 | 0.1871 | -0.3453 | 1.7665 | 2.0352 | 0.7080 | 5.8502  |
| ebi-a-GCST006686 | finn-b-O15_ABORT_SPO<br>NTAN | Spontaneous abortion    id:finn-b-O15_ABORT_SPONTAN                   | short sleep duration | Inverse variance weighted | 23 | 0.3191  | 0.3471 | 0.3579 | -0.3612 | 0.9994 | 1.3759 | 0.6968 | 2.7168  |
| ebi-a-GCST006686 | finn-b-O15_ABORT_SPO<br>NTAN | Spontaneous abortion    id:finn-b-O15_ABORT_SPONTAN                   | short sleep duration | Simple mode               | 23 | 1.6250  | 1.0266 | 0.1277 | -0.3870 | 3.6371 | 5.0786 | 0.6791 | 37.9810 |
| ebi-a-GCST006686 | finn-b-O15_ABORT_SPO<br>NTAN | Spontaneous abortion    id:finn-b-O15_ABORT_SPONTAN                   | short sleep duration | Weighted mode             | 23 | 1.2079  | 0.7331 | 0.1136 | -0.2290 | 2.6448 | 3.3465 | 0.7953 | 14.0812 |
| ukb-b-4424       | ukb-b-10903                  | endometriosis    id:ukb-b-10903                                       | Sleep duration       | MR Egger                  | 52 | -0.0109 | 0.0113 | 0.3428 | -0.0331 | 0.0114 | 0.9892 | 0.9674 | 1.0114  |

|            |                         |                                                  |                |                           |    |         |        |        |         |        |        |        |        |
|------------|-------------------------|--------------------------------------------------|----------------|---------------------------|----|---------|--------|--------|---------|--------|--------|--------|--------|
| ukb-b-4424 | ukb-b-10903             | endometriosis    id:ukb-b-10903                  | Sleep duration | Weighted median           | 52 | -0.0008 | 0.0037 | 0.8330 | -0.0080 | 0.0065 | 0.9992 | 0.9920 | 1.0065 |
| ukb-b-4424 | ukb-b-10903             | endometriosis    id:ukb-b-10903                  | Sleep duration | Inverse variance weighted | 52 | 0.0025  | 0.0026 | 0.3405 | -0.0026 | 0.0076 | 1.0025 | 0.9974 | 1.0076 |
| ukb-b-4424 | ukb-b-10903             | endometriosis    id:ukb-b-10903                  | Sleep duration | Simple mode               | 52 | -0.0009 | 0.0090 | 0.9193 | -0.0187 | 0.0168 | 0.9991 | 0.9815 | 1.0170 |
| ukb-b-4424 | ukb-b-10903             | endometriosis    id:ukb-b-10903                  | Sleep duration | Weighted mode             | 52 | -0.0041 | 0.0072 | 0.5716 | -0.0181 | 0.0100 | 0.9959 | 0.9820 | 1.0100 |
| ukb-b-4424 | finn-b-N14_FEMALEINFERT | Female infertility    id:finn-b-N14_FEMALEINFERT | Sleep duration | MR Egger                  | 58 | -0.6366 | 1.0234 | 0.5365 | -2.6424 | 1.3693 | 0.5291 | 0.0712 | 3.9324 |
| ukb-b-4424 | finn-b-N14_FEMALEINFERT | Female infertility    id:finn-b-N14_FEMALEINFERT | Sleep duration | Weighted median           | 58 | -0.1682 | 0.3993 | 0.6735 | -0.9509 | 0.6144 | 0.8452 | 0.3864 | 1.8486 |
| ukb-b-4424 | finn-b-N14_FEMALEINFERT | Female infertility    id:finn-b-N14_FEMALEINFERT | Sleep duration | Inverse variance weighted | 58 | -0.1992 | 0.2704 | 0.4614 | -0.7292 | 0.3308 | 0.8194 | 0.4823 | 1.3921 |
| ukb-b-4424 | finn-b-N14_FEMALEINFERT | Female infertility    id:finn-b-N14_FEMALEINFERT | Sleep duration | Simple mode               | 58 | 0.2385  | 0.8540 | 0.7810 | -1.4353 | 1.9123 | 1.2693 | 0.2380 | 6.7687 |
| ukb-b-4424 | finn-b-N14_FEMALEINFERT | Female infertility    id:finn-b-N14_FEMALEINFERT | Sleep duration | Weighted mode             | 58 | -0.0547 | 0.6901 | 0.9371 | -1.4074 | 1.2979 | 0.9467 | 0.2448 | 3.6618 |
| ukb-b-4424 | ukb-d-N94               | abnormal uterine bleeding    id:ukb-d-N94        | Sleep duration | MR Egger                  | 58 | 0.0030  | 0.0065 | 0.6505 | -0.0098 | 0.0157 | 1.0030 | 0.9903 | 1.0158 |

|            |                    |                                                                       |                |                           |    |         |        |        |         |        |        |        |         |
|------------|--------------------|-----------------------------------------------------------------------|----------------|---------------------------|----|---------|--------|--------|---------|--------|--------|--------|---------|
| ukb-b-4424 | ukb-d-N94          | abnormal uterine bleeding    id:ukb-d-N94                             | Sleep duration | Weighted median           | 58 | 0.0005  | 0.0027 | 0.8472 | -0.0048 | 0.0058 | 1.0005 | 0.9952 | 1.0059  |
| ukb-b-4424 | ukb-d-N94          | abnormal uterine bleeding    id:ukb-d-N94                             | Sleep duration | Inverse variance weighted | 58 | -0.0018 | 0.0018 | 0.3011 | -0.0053 | 0.0016 | 0.9982 | 0.9947 | 1.0016  |
| ukb-b-4424 | ukb-d-N94          | abnormal uterine bleeding    id:ukb-d-N94                             | Sleep duration | Simple mode               | 58 | -0.0005 | 0.0062 | 0.9396 | -0.0125 | 0.0116 | 0.9995 | 0.9875 | 1.0117  |
| ukb-b-4424 | ukb-d-N94          | abnormal uterine bleeding    id:ukb-d-N94                             | Sleep duration | Weighted mode             | 58 | 0.0012  | 0.0048 | 0.8023 | -0.0082 | 0.0106 | 1.0012 | 0.9918 | 1.0107  |
| ukb-b-4424 | ebi-a-GCST90044902 | Polycystic ovary syndrome (adjusted for age)    id:ebi-a-GCST90044902 | Sleep duration | MR Egger                  | 58 | -1.5316 | 1.1944 | 0.2050 | -3.8726 | 0.8093 | 0.2162 | 0.0208 | 2.2464  |
| ukb-b-4424 | ebi-a-GCST90044902 | Polycystic ovary syndrome (adjusted for age)    id:ebi-a-GCST90044902 | Sleep duration | Weighted median           | 58 | -0.6102 | 0.5092 | 0.2307 | -1.6082 | 0.3877 | 0.5432 | 0.2003 | 1.4736  |
| ukb-b-4424 | ebi-a-GCST90044902 | Polycystic ovary syndrome (adjusted for age)    id:ebi-a-GCST90044902 | Sleep duration | Inverse variance weighted | 58 | -0.1803 | 0.3297 | 0.5845 | -0.8264 | 0.4659 | 0.8350 | 0.4376 | 1.5934  |
| ukb-b-4424 | ebi-a-GCST90044902 | Polycystic ovary syndrome (adjusted for age)    id:ebi-a-GCST90044902 | Sleep duration | Simple mode               | 58 | 1.9781  | 1.2175 | 0.1097 | -0.4082 | 4.3644 | 7.2288 | 0.6648 | 78.6028 |
| ukb-b-4424 | ebi-a-GCST90044902 | Polycystic ovary syndrome (adjusted for age)    id:ebi-a-GCST90044902 | Sleep duration | Weighted mode             | 58 | -1.2026 | 0.8178 | 0.1469 | -2.8055 | 0.4003 | 0.3004 | 0.0605 | 1.4923  |

|                                                                                                                                        |                              |                                                        |                |                           |    |         |        |        |         |        |        |        |        |
|----------------------------------------------------------------------------------------------------------------------------------------|------------------------------|--------------------------------------------------------|----------------|---------------------------|----|---------|--------|--------|---------|--------|--------|--------|--------|
| ukb-b-4424                                                                                                                             | finn-b-O15_ABORT_SPO<br>NTAN | Spontaneous abortion   <br>id:finn-b-O15_ABORT_SPONTAN | Sleep duration | MR Egger                  | 58 | 0.3593  | 0.8137 | 0.6605 | -1.2356 | 1.9542 | 1.4323 | 0.2907 | 7.0581 |
| ukb-b-4424                                                                                                                             | finn-b-O15_ABORT_SPO<br>NTAN | Spontaneous abortion   <br>id:finn-b-O15_ABORT_SPONTAN | Sleep duration | Weighted median           | 58 | 0.0490  | 0.3146 | 0.8764 | -0.5677 | 0.6656 | 1.0502 | 0.5668 | 1.9456 |
| ukb-b-4424                                                                                                                             | finn-b-O15_ABORT_SPO<br>NTAN | Spontaneous abortion   <br>id:finn-b-O15_ABORT_SPONTAN | Sleep duration | Inverse variance weighted | 58 | -0.0824 | 0.2149 | 0.7014 | -0.5037 | 0.3389 | 0.9209 | 0.6043 | 1.4034 |
| ukb-b-4424                                                                                                                             | finn-b-O15_ABORT_SPO<br>NTAN | Spontaneous abortion   <br>id:finn-b-O15_ABORT_SPONTAN | Sleep duration | Simple mode               | 58 | 0.1727  | 0.6944 | 0.8044 | -1.1882 | 1.5337 | 1.1885 | 0.3048 | 4.6353 |
| ukb-b-4424                                                                                                                             | finn-b-O15_ABORT_SPO<br>NTAN | Spontaneous abortion   <br>id:finn-b-O15_ABORT_SPONTAN | Sleep duration | Weighted mode             | 58 | 0.3078  | 0.5667 | 0.5891 | -0.8029 | 1.4185 | 1.3604 | 0.4480 | 4.1308 |
| Note: <b>GWAS</b> , Genome-Wide Association Study. <b>MR</b> , Mendelian Randomization. <b>SNPs</b> , Single Nucleotide Polymorphisms. |                              |                                                        |                |                           |    |         |        |        |         |        |        |        |        |
